# Supplementary material for: Atmospheric H 2 observations from the NOAA Cooperative Global Air Sampling Network
Source: Copernicus journal article supplement (doi:10.5194/amt-17-4803-2024), 2024-08-23

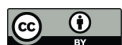

*Supplement of*

## **Atmospheric H<sub>2</sub> observations from the NOAA Cooperative Global Air Sampling Network**

**Gabrielle Pétron et al.**

*Correspondence to:* Gabrielle Pétron ([gabrielle.petron@noaa.gov](mailto:gabrielle.petron@noaa.gov))

The copyright of individual parts of the supplement might differ from the article licence.

## **S1. Limitations of NOAA GML 1988-2009 H<sub>2</sub> measurements on RGAs**

Novelli et al. (1999) describe the NOAA H<sub>2</sub> flask air measurement procedure for 1988-1997. A few aspects of the program for the period 1988-2009 are summarized here to explain limitations in the older NOAA H<sub>2</sub> dataset and the decision to not convert older measurements to the current WMO recommended calibration scale. These limitations can broadly be categorized as 1) issues related to the non-linear response of the analyzers used for flask analysis, 2) instability in the underlying internal scale maintained by GML, and 3) lack of adequate electronic records to provide full transparency. These all impact the quality and internal consistency of the early data and the ability to retroactively convert the early data to the current WMO recommended H<sub>2</sub> in air calibration scale.

### ***Insufficient instrument response characterization***

Prior to 2009, NOAA GML used gas chromatography followed by hot mercuric oxide reduction (GC-HgO) and the UV absorption detection of the resulting elemental mercury for both standard air and flask air analyses of H<sub>2</sub>. GML used commercial Reduction Gas Analyzer GC modules with HgO bed reduction gas detector from Trace Analytical Inc. (Menlo Park, California) and Peak Laboratories, LLC (Menlo Park, California). The NOAA RGA analyzers measured both H<sub>2</sub> and CO in the same chromatogram. Table S1 (further below) gives a list of the RGA instruments and working standards in service prior to the adoption of the GC-HePDD measurement technique.

The first instrument used, R2 (RGA3 GC module with RGD2 detector), was found to have a linear response for CO and H<sub>2</sub> over the range of mole fractions in the background atmosphere (Novelli et al., 1991, 1992). However, Novelli et al. (1992) cautioned that the instrument absolute response and linearity were HgO bed dependent and could change over time.

After 1990, all new HgO bed detectors had non-linear responses for both CO and H<sub>2</sub> (Novelli et al., 1998; Novelli et al., 2003). CSIRO and MPI-BGC H<sub>2</sub> measurement teams have reported similar results (Francey et al., 2003; Jordan and Steinberg, 2011).

In 1991, GML started using a suite of standards covering a range of CO mole fractions to create calibration curves during dedicated instrument response calibration episodes approximately bi-weekly (Novelli et al., 1998). This approach was not adopted for H<sub>2</sub>, likely due to a lack of standards with stable H<sub>2</sub>. Instead, for H<sub>2</sub> measurements, GML used a 1-point calibration strategy where the CO reference air tank, which brackets each sample aliquot, was value assigned for H<sub>2</sub> and used as the single H<sub>2</sub> working standard for calibrating flask air sample measurements. This strategy ignored the non-linear response of the detectors.

The non-linearity of the RGA3 response was assumed to be negligible over the narrow range of H<sub>2</sub> observed in background air samples from remote network sites. However, the impact of the non-linear response also depended on the H<sub>2</sub> working standards being themselves close to ambient H<sub>2</sub> mole fractions. In actuality, recorded H<sub>2</sub> assignments for the older working standards used for flask analysis ranged from 470 ppb to 644 ppb. This would give rise to persistent non-linearity induced biases on time scales of 6-18 months (the typical lifetime of the working standards) in the H<sub>2</sub> measurement records. GML did not characterize the non-linearity of the H<sub>2</sub> response of the RGAs so cannot retroactively correct for this

effect. The biases are expected to be significant for some time periods leading the authors to caution against using the NOAA early H<sub>2</sub> data records.

### ***Instability in the NOAA H<sub>2</sub> X1996 calibration scale***

NOAA H<sub>2</sub> mole fraction measurements from 1988 - 2009 are traceable to an internal calibration scale (NOAA H<sub>2</sub> X1996) maintained by GML. This scale was defined by five gravimetric standards made in 1995/1996 (CC73198, CC86013, CA01310, CC86208, CC86259) and covering the range 485 - 600 ppb H<sub>2</sub>.

The X1996 scale was propagated to the five working standards (tanks ID with \* in Table S1) used between 1988 and 1995 for flask air sample analyses by measurement against the gravimetric standards in 1996 (Novelli et al., 1999). However, these post deployment calibrations could not assess the stability of the working standards during usage prior to 1996 so any drift occurring in the working standards prior to 1996 would be unaccounted for leading to potential biases in the earliest records.

After 1996, the NOAA H<sub>2</sub> X1996 scale was maintained by bootstrapping secondary standards forward in time. In this method, each secondary standard was used to directly calibrate its successor. This method assumed no drift was occurring in either the initial secondary standard, nor in any subsequent secondary standard. While care was taken to use cylinders for secondary standards that did not display initial high drift of H<sub>2</sub>, we now know that H<sub>2</sub> stability in air standards contained in aluminum cylinders is rare and growth of H<sub>2</sub> over time is much more likely. The bootstrap method is likely to have introduced long-term instability in the scale.

### ***Incomplete record keeping early on***

There is no electronic record of any calibration and no recorded assigned value for R7 working standard AAL-17259 used from February to August 1997. All R5 and R6 working standards have assignments on X1996 recorded back in June 2014, covering a wide range: 470-650 ppb. Only the later R5 standards (CC105928, CC71649) and R6 standards (CA06591, CC305198) have assignments with a linear drift correction. The other standards were assumed stable.

In addition to the other known limitations in the early implementation of the H<sub>2</sub> measurements, the lack of record keeping during the early years plays a role in the decision to not retroactively convert the early data to the current WMO recommended calibration scale. Documentation of decisions on standard value assignments, electronic records of raw data files for the instrument responses, and details of calibration hierarchy from the early records are often missing or lack sufficient detail. Unfortunately, this makes it impossible to recover the data, even within the larger uncertainties associated with the measurement issues discussed.

### ***Examples of observed biases in the older NOAA H<sub>2</sub> measurements***

Close in time analysis of CC119811 on P2 in 2007 and 2008 against one of three SX standards (SX3540, SX-3523 or SX-3554) show a > 20 ppb spread in the derived H<sub>2</sub> (Figure S12), suggesting a strong non-linear response for P2. The response of the P2 instrument was never fully characterized. However, Novelli et al. (2009) (Table 4 herein) show results for eight tanks analyzed on P2 using one point or two

point calibration compared to their results on H<sub>9</sub>. The one point calibration results show the larger biases, especially for tanks with H<sub>2</sub> furthest from the H<sub>2</sub> in the reference/standard (525 ppb): underestimation for tanks with H<sub>2</sub> below 525 ppb reaching close to -20ppb at 420 ppb and overestimation for tanks with H<sub>2</sub> above 525 ppb reaching +12 ppb at 593 ppb.

The responses of the R5 and R6 instruments were never fully characterized. However NOAA started the regular analysis of target air tanks on the MAGICC-1 and MAGICC-2 systems in 2004. Results for target air tanks CC71583 (D) and CC1824 (H) are plotted in Figure S13 using different symbols and colors for different instruments and working standards. GC-HePDD measurements after 2008 show H<sub>2</sub> growing in both tanks. The earlier results on R5 and R6 are scattered and suggest inconsistent assignments between the working standards, also likely including incorrect drift estimates. It is not robust to extrapolate a tank H<sub>2</sub> assignment based on available measurements on H<sub>9</sub> a few or several years back in time as the stability or growth of H<sub>2</sub> in high pressure aluminum cylinders can change over time.

## **S2. Same air comparison with CSIRO for NOAA historical H<sub>2</sub> data**

CSIRO started measuring H<sub>2</sub> by gas chromatography with mercuric oxide detector (GC-HgO) using a Trace Analytical RGA instrument in 1991. Data are reported on the MPI X2009 H<sub>2</sub> calibration scale. CSIRO's implementation of the scale in recent years is defined by a suite of 5 H<sub>2</sub>-in-air standards contained in electropolished 34L stainless steel cylinders (Essex Industries, St. Louis, MO) that were calibrated at MPI-BGC in 2016.

Implementation of the scale before 2016 is based on in-house calibration procedures involving repeat determinations of the non-linearity of instrument response and multi-decadal measurement histories of a large number of air standards.

From 1993, CSIRO started using "dilution experiments" of above ambient CH<sub>4</sub>, H<sub>2</sub> and CO mole fraction air blended with varying proportions of purified zero air to periodically characterize the non-linearity of their GC-HgO instrument for CO and H<sub>2</sub>. Dilution ratios were determined by measurements of CH<sub>4</sub> tied to a gravimetrically defined CH<sub>4</sub> calibration scale. They found the instrument response was "significantly nonlinear" and of similar shape for both H<sub>2</sub> and CO (of the form  $y=ax^2+bx+cx^d$ , where  $x$  = peak height and  $a,b,c,d$  are estimated parameters from the response function fit). A single response function was used for H<sub>2</sub> in the early 1991-1995 period due to insufficient well-behaved standards with mole fractions outside of the background atmospheric range to adequately monitor variations in the instrument response function (Francey et al., 2003).

Long term stability of CSIRO's H<sub>2</sub> records is constrained by observed relative stability of a large number of air standards stored in various stainless steel and aluminum cylinder types. A key constraint is relative stability to better than  $\pm 0.2$  ppb/yr among 59 individual standards in 34L or 35L stainless steel Essex cylinders as measured over time intervals of 7+ years. Of these, 29 were first analyzed between 1992 and 1999.

The early intercomparison of measurements by NOAA GML and CSIRO same air from the Kennaook/Cape Grim Observatory (1992-1998) showed significant (>2%) and trending biases (Masarie et al., 2001). The nonlinear response of the H<sub>2</sub> analytical system detector, the instability of H<sub>2</sub> standards stored in aluminum cylinders (commonly used for CO<sub>2</sub> and CH<sub>4</sub> standards) and the different calibration scales were presented as likely explanations for the observed time-dependent biases between the two labs.

### **S3. WMO/MPI-BGC X2009 H<sub>2</sub> calibration scale**

To support advances in the understanding of the H<sub>2</sub> global budget, high quality and comparable observations are a non-negotiable requirement and should be anchored by a common stable calibration scale (WMO, 2007). The Max Planck Institute for Biogeochemistry (MPI-BGC) in Jena secured funding to support their laboratory work to investigate the stability of the H<sub>2</sub> mole fraction for reference air in various types of high pressure cylinders and to develop an accurate H<sub>2</sub> calibration scale. Jordan and Steinberg (2011) analyzed 100 air standards multiple times over a one to six year period on their GC-HgO instrument calibrated using multiple H<sub>2</sub> in real air standard gases to fully describe the detector nonlinear response. They concluded that the H<sub>2</sub> mole fraction for reference air in steel and stainless steel cylinders did not drift significantly (< 1.5 ppb/yr). For aluminum cylinders however, they found a wide range of H<sub>2</sub> mole fraction drift rates (< 1.5 ppb/yr to > 20 ppb/yr) and drift behaviors (short term, ie. drift over a few months, to continued growth in H<sub>2</sub>). The MPI X2009 scale became the official WMO scale for H<sub>2</sub> in 2011 (Jordan and Steinberg, 2011). It is defined by thirteen standards (of which 12 are in stainless steel cylinders) with H<sub>2</sub> dry air mole fractions ranging from 139 ppb to 1226 ppb.

Once a CCL was established for H<sub>2</sub>, experts from the WMO Global Atmospheric Watch recommended measurement laboratories adopt the WMO/MPI 2009 scale and develop procedures to track drifts in their standards and to appropriately characterize their instrument responses (WMO/GAW, 2014).

In 2007-2008, GML prepared 6 H<sub>2</sub> gravimetric standards ranging from 230 to 790 ppb in electropolished stainless steel cylinders (Essex Cryogenics, with tank IDs SX-#). Early results in WMO GAW measurement laboratories suggested H<sub>2</sub> was likely more stable in these cylinders than in aluminum cylinders. However, the new gravimetric mixtures differed by about +20 ppb compared to two H<sub>2</sub> secondary standards in aluminum cylinders GML used for the calibration of tertiary standards on the X1996 scale (Novelli, personal communication). In following years, GML continued using the 1996 gravimetric primary standards to define its internal H<sub>2</sub> calibration scale and also regularly measured the H<sub>2</sub> secondary standards against the stainless steel standards.

### **S4. MAGICC-3 reference air CA04145**

To evaluate the stability of the reference air H<sub>2</sub> and the validity of the H<sub>2</sub> instrument response curve fit coefficients between MAGICC-3 instrument response calibration dates, we derive an H<sub>2</sub> assignment for the reference air cylinder for each instrument response calibration date (ratio of peak heights =1). For each MAGICC-3 reference air cylinder, we calculate its mean H<sub>2</sub> for the time period for which it was in use. The mean H<sub>2</sub> values for the 6 reference air cylinders used between July 2019 and January 2023 range

between 542 and 583 ppb.

In Figure S3 we plot the deviation of each reference air cylinder assignment from its mean value as a function of the MAGICC-3 instrument response calibration date. The very first reference CA04145 air cylinder had the largest growth in its H<sub>2</sub> mole fraction: + 7.5 ppb in 5 months (~ 18 ppb/yr). The incremental increase between calibration dates is larger when the calibration becomes less frequent in late 2019. We apply a correction of  $18 \cdot (\Delta t)$  to flask analysis results on MAGICC-3 between 11/6/2019 and 1/16/2020 with  $\Delta t$  being the difference between the flask analysis decimal date and the preceding response calibration decimal date (corresponding to calendar dates 11/6/2019, 12/4/2019 or 1/7/2020). For the period 3/26 to 8/1 2020 with the second reference air cylinder, MAGICC-3/H8 was more noisy and the increments in the reference air H<sub>2</sub> between response calibration dates jumped from -1 ppb to 1 ppb twice.

## S5. References

Francey, R. J., Steele, L. P., Spencer, D. A., Langenfelds, R. L., Law, R. M.; Krummel, P. B., Fraser, P. J., Etheridge, D. M., Derek, N., Coram, S. A., Cooper, L. N., Allison, C. E., Porter, L., Baly, S.: The CSIRO (Australia) measurement of greenhouse gases in the global atmosphere. In: Tindale, N. W.; Derek, N.; Fraser, P. J. editors. Baseline Atmospheric Program Australia. Melbourne: Bureau of Meteorology and CSIRO Atmospheric Research; pp. 42-53. <http://hdl.handle.net/102.100.100/191835?index=1>, 2003.

Jordan, A., Damak, F.: ICOS Central Analytical Laboratories Flask and Calibration Laboratory, Quality Control Report 2022, 85p, available at: <https://www.icos-cal.eu/fcl/qc-report>, (Last Accessed December 13, 2023), 2022.

Masarie, K. A., Langenfelds, R. L., Allison, C. E., Conway, T. J., Dlugokencky, E. J., Francey, R. J., Novelli, P. C., Steele, L. P., Tans, P. P., Vaughn, B., White, J. W. C.: NOAA/CSIRO Flask Air Intercomparison Experiment: A strategy for directly assessing consistency among atmospheric measurements made by independent laboratories, *J. Geophys. Res.*, 106(D17), 20445–20464, doi:10.1029/2000JD000023, 2001.

Novelli, P. C., Elkins, J. W., Steele, L. P.: The Development and Evaluation of a Gravimetric Reference Scale For Measurements of Atmospheric Carbon Monoxide, *J. Geophys. Res.*, 96, 13,109-13,121, doi: 10.1029/91JD01108, 1991.

Novelli, P. C., Steele, L. P., and Tans, P. P.: Mixing ratios of carbon monoxide in the troposphere, *J. Geophys. Res.*, 97, 20,731-20,750, doi: 10.1029/92JD02010, 1992.

Novelli, P. C., Lang, P. M., Masarie, K. A., Hurst, D. F., Myers, R., Elkins, J. W.: Molecular hydrogen in the troposphere: Global distribution and budget, *J. Geophys. Res.*, 104, 30427–30444, doi: 10.1029/1999JD900788, 1999.

Novelli, P. C., Crotwell, A. M., and Hall, B. D., Application of Gas Chromatography with a Pulsed Discharged Helium Ionization Detector for Measurements of Molecular Hydrogen, *Env. Sci. Technol.* (43), 2431-2436, doi: 10.1021/es803180g, 2009.

WMO/GAW, 17th WMO/IAEA Meeting on Carbon Dioxide, Other Greenhouse Gases and Related Tracers Measurement Techniques (GGMT-2013) (Beijing, China, 10 - 13 June 2013) Edited by Pieter Tans and Christoph Zellweger, report 213. Accessible at [https://www.unclearn.org/wp-content/uploads/library/gaw\\_213\\_en.pdf](https://www.unclearn.org/wp-content/uploads/library/gaw_213_en.pdf). (Last accessed November 10, 2023), 2014.

## Tables

Table S1: List of instruments and reference air tanks used for H<sub>2</sub> in air sample measurements in NOAA GML prior to 2010.

| Tank Air Analysis  |          |           |       |            |                                                                         |                                                                                                                         |
|--------------------|----------|-----------|-------|------------|-------------------------------------------------------------------------|-------------------------------------------------------------------------------------------------------------------------|
| Dates of operation | System   | Instr. ID | Model | Response   | Secondary standard tank ID                                              | Notes                                                                                                                   |
| 1993-1997          | rgd2     | R2        | RGD2  | Linear     | CC73110*, CC71607                                                       | No electronic records of calibration prior to 2001. Later used as Target air for H9.                                    |
| 1997-2006          | rgd2     | R7        | RGA3  | Non-linear | CC73110*, CC71607                                                       |                                                                                                                         |
| 2006-2008          | cocal-1  | P2        | PP1   | Non-linear | CC119811                                                                | See Figure S12                                                                                                          |
| Flask Air Analysis |          |           |       |            |                                                                         |                                                                                                                         |
| Dates              | System   | Instr. ID | Model | Response   | Working standard tank ID                                                | Notes                                                                                                                   |
| 1988-1990          | rgd2     | R2        | RGA3  | Linear     | AAL-17262, CC68734*                                                     | * H <sub>2</sub> was assigned against 1996 gravimetric standards and early data was reprocessed (Novelli et al., 1998). |
| 1990-1995          | carle    | R4        | RGA3  | Non-linear | AAL-17269*, AAL-17270*, CC105871*                                       |                                                                                                                         |
| 1995-1997          | carle    | R7        | RGA3  | Non-linear | CC105871, AAL-17259                                                     | Assignments for later working standards were mostly inferred from earlier tanks, assuming no drift.                     |
| 1997-2010          | MAGICC-1 | R5        | RGA3  | Non-linear | CA02439, CA01493, CA02952, CA01777, CC61344, CA06593, CC105928, CC71649 |                                                                                                                         |
| 2004-2009          | MAGICC-2 | R6        | RGA3  | Non-linear | CA02439, CA06527, CC68676, CA06591, CC305198                            |                                                                                                                         |



Table S2: H<sub>2</sub> secondary standards used in the tank calibration laboratory and H<sub>2</sub> tertiary standards used on the MAGICC-1 and MAGICC-2 systems (2009 to 2019). Assignments made on 2023-01-24 for all tanks except CA08107 and CB11090 for which assignments were entered on 2023-04-24.

| Tank Calibration / H9 |                          |           |                        |             |                           |            |                                    |                    |
|-----------------------|--------------------------|-----------|------------------------|-------------|---------------------------|------------|------------------------------------|--------------------|
| Tank ID (fill)        | Time of use              | t0        | Assignment at t0 (ppb) | C1 (ppb/yr) | C2 (ppb/yr <sup>2</sup> ) | N          | Residuals standard deviation (ppb) | Fill date          |
| CC119811 (A)          | 2/05/2008 to 6/02/2013   | 2010.0689 | 549.4                  | 2.0         | 0                         | 47         | 0.50                               | 01/01/2006 SM*     |
| CA03233 (B)           | 6/02/2013 to 11/01/2018  | 2016.7106 | 502.8                  | 0           | 0                         | 19         | 0.23                               | 08/12/2010 NWR     |
| MAGICC-1 / H11        |                          |           |                        |             |                           |            |                                    |                    |
| Tank ID (fill)        | Time of use              | t0        | Assignment at t0 (ppb) | C1 (ppb/yr) | C2 (ppb/yr <sup>2</sup> ) | N          | Assignment uncertainty (ppb)**     | Fill date          |
| CA08107 (D)           | 7/22 to 8/7/2019         | 2019.2959 | 562.9                  | 15.4        | 0                         | 6          | 0.6                                | 11/9/2018 NWR      |
| CB11090 (B)           | 10/18/2018 to 7/19/2019  | 2019.1482 | 576.3                  | 6.9         | 0                         | 4a         | 0.6<br>After 2019-06-21:<br>1.5    | 9/30/2016 NWR      |
| CB11551 (A)           | 2/13 to 10/17/2018       | 2018.1878 | 548.8                  | 6.7         | 0                         | 3a,b,<br>c | 0.5<br>After 2018-08-27:<br>1.5    | 1/1/2015 SM*       |
| CC91285 (C)           | 6/19/2017 to 2/13/2018   | 2017.1711 | 538.4                  | 0           | 0                         | 8          | 0.5                                | 8/14/2015 NWR      |
| CA08165 (B)           | 10/13/2016 to 06/16/2017 | 2016.9137 | 535.7                  | 4.5         | 0                         | 3c         | 0.5                                | 12/16/2011 NWR     |
| CC302566 (B)          | 3/21/2016 to 10/12/2016  | 2016.3645 | 540.2                  | 4.4         | 0                         | 5          | 0.5                                | 8/14/2015 NWR      |
| CC105491 (B)          | 8/10/2015 to 3/18/2016   | 2015.1506 | 522.3                  | 0           | 0                         | 5d         | 1.0                                | 1/16/2014 NWR      |
| ND33801 (B)           | 8/4/2014 to 8/7/2015     | 2013.8771 | 509.3                  | 0.9         | 0                         | 6e         | 0.5<br>After 2015-05-14:<br>1.0    | 12/27/2012 NWR     |
| CB09117 (A)           | 2/18 to 8/1/2014         | 2013.8912 | 635.3                  | 28.7        | 0                         | 5          | 2                                  | 12/17/2012 SM      |
| ND46735 (A)           | 9/10/2012 to 2/13/2014   | 2012.9158 | 527.4                  | 2.5         | -1.0                      | 7e,f       | 0.5<br>After 2013-12-11:<br>1.0    | 1/1/2011 estimated |
| CA04505 (B)           | 12/9/2011 to 9/7/2012    | 2011.4593 | 540.6                  | 1.7         | 0                         | 3c,d       | 1.0                                | 8/12/2010 NWR      |
| ND38963 (A)           | 8/12/2010 to 12/7/2011   | 2011.704  | 586.0                  | 6.2         | 0                         | 4          | 0.5                                | 1/1/2009 estimated |
| CC71649               | 1/22 to 8/6              | 2009.1184 | 507.1                  | 8.4         | 0                         | 7b,e       | 1.5                                | 9/19/2008          |

| (E)            | 2010                   |           |                        |      |      |      |                                 |                    |
|----------------|------------------------|-----------|------------------------|------|------|------|---------------------------------|--------------------|
| MAGICC-2 / H8  |                        |           |                        |      |      |      |                                 |                    |
| Tank ID (fill) | Time of use            |           | Assignment at t0 (ppb) | C1   | C2   | N    | Assignment uncertainty (ppb)**  | Fill date          |
| ND38954 (B)    | 3/26/2013 to 3/21/2014 | 2014.2094 | 516.6                  | 2.0  | 0    | 5    | 0.5                             | 12/9/2012 NWR      |
| CA03409 (B)    | 5/23/2011 to 3/25/2013 | 2011.6278 | 526.6                  | 0    | 0    | 5e   | 0.5<br>After 2013-01-21:<br>1.0 | 1/1/2010 estimated |
| ND38415 (A)    | 4/5/2010 to 5/20/2011  | 2010.2502 | 566.1                  | 20.9 | -8.7 | 6    | 0.5                             | 1/1/2009 estimated |
| CC305198 (A)   | 11/2//2009 to 4/3/2010 | 2009.7211 | 557.9                  | 65.8 | 0    | 3a,b | 1.5<br>After 2010-01-31:<br>2.5 | 1/1/2009 SM*       |

\* Gravimetric blends with CO, H<sub>2</sub>, CO<sub>2</sub>, CH<sub>4</sub> and N<sub>2</sub>O in zero air purchases from Scott Marrin.

\*\* Uncertainty estimates listed for the tertiary standard assignments assume a 0.5 ppb uncertainty for each calibration result on H9 and do not formally include the uncertainty on the secondary standard assignments.

- a. Assignment does not use existing post-use calibration results that show larger drift
- b. Drift change towards end of use, additional drift correction applied.
- c. Force linear fit in drift calculation code
- d. Only predeployment calibrations
- e. No end-of-use or post-use calibration
- f. Force quadratic fit in drift calculation code

Table S3: H<sub>2</sub> standards used on the MAGICC-3 system. Best polynomial curve fit coefficients to the August 2019-December 2022 calibration histories. Assignments made on 2023-01-24.

| Tank ID (fill) | t0        | Assignment at t0 (ppb) | C1 (ppb/yr) | C2 (ppb/yr <sup>2</sup> ) | N | Assignment uncertainty (ppb) | Fill date      |
|----------------|-----------|------------------------|-------------|---------------------------|---|------------------------------|----------------|
| CA01414 (I)    | 2020.0964 | 238.4                  | 10.0        | -1.9                      | 9 | 0.5 ppb                      | 12/29/2017 NWR |
| CA04403 (F)    | 2020.1052 | 474.6                  | 10.2        | -1.7                      | 9 | 0.5 ppb                      | 12/1/2017 NWR  |
| CB11270 (A)    | 2020.0012 | 515.0                  | 2.9         | -0.5                      | 9 | 0.5 ppb                      | 12/1/2017 NWR  |
| CA06388 (H)    | 2019.9423 | 551.2                  | 1.1         | 0                         | 9 | 0.5 ppb                      | 2/23/2018 NWR  |
| CA05773 (F)    | 2020.2585 | 565.6                  | 1.4         | 0                         | 8 | 0.5 ppb                      | 5/17/2018 NWR  |
| CB11034 (B)    | 2020.0783 | 580.1                  | 8.3         | -1.2                      | 9 | 0.5 ppb                      | 5/17/2018 NWR  |
| CA05680 (H)    | 2020.0904 | 588.1                  | 1.9         | 0                         | 9 | 0.5 ppb                      | 12/1/2017 NWR  |
| CB11405 (C)    | 2020.1474 | 605.6                  | 23.3        | -1.6                      | 9 | 0.5 ppb                      | 5/17/2018 NWR  |

Table S4: H9 target tanks and the polynomial best fits to their calibration histories between 2009 and 2022.

| Tank ID (fill) | Calibration date range on H9 | t0         | Assignment at t0 (ppb) | C1 (ppb/yr) | C2 (ppb/yr <sup>2</sup> ) | N  | Residual standard deviation (ppb) | Fill date (location if known) (R=Refilled) |
|----------------|------------------------------|------------|------------------------|-------------|---------------------------|----|-----------------------------------|--------------------------------------------|
| CC311842 (A)   | 2019-2022                    | 2020.9878  | 478.6                  | 0           | 0                         | 8  | 0.32                              | 2009-09-04 (NWR)                           |
| ND33960 (C)    | 2018-2022                    | 2019.9289  | 529.5                  | 0           | 0                         | 11 | 0.43                              | 2014-03-05 (NWR)                           |
| CC121971 (G)   | 2019-2022                    | 2021.0834  | 546.5                  | 0           | 0                         | 9  | 0.30                              | 2012-05-10 (NWR)                           |
| CA06194 (B)    | 2019-2022                    | 2020.7726  | 578.4                  | 0           | 0                         | 10 | 0.49                              | 2008-09-25 (NWR)                           |
| ND16439 (A)    | 2008-2015                    | 2009.66673 | 635.9                  | 0           | 0                         | 9  | 0.54                              | 2002-01-01 (R)                             |
| CA08247 (A)    | 2020-2022                    | 2021.2483  | 675.1                  | 0           | 0                         | 7  | 0.73                              | 2008-10-01 (NWR)                           |
| CA05278 (A)    | 2008-2014                    | 2011.8239  | 675.2                  | 0           | 0                         | 7  | 0.56                              | 2007-03-01 (MPI) (R)                       |
| CA05300 (A)    | 2008-2014                    | 2011.8667  | 596.8                  | 0.84        | 0                         | 7  | 0.31                              | 2007-03-01 (MPI) (R)                       |
| CC71607 (A)    | 2008-2021                    | 2016.889   | 537.9                  | 0.44        | 0                         | 18 | 0.34                              | 1991-10-01                                 |
| CC73110 (A)    | 2008-2021                    | 2016.1309  | 563.8                  | 0.79        | 0                         | 19 | 0.41                              | 1990-01-01 (NWR, SM Luxfer)                |
| CA04551 (F)    | 2012-2016                    | 2014.9953  | 523.18                 | 4.55        | 0                         | 42 | 0.32                              | 2011-12-21 (NWR)                           |
| CA07328 (A)    | 2008-2010                    | 2009.2785  | 598.7                  | 2.83        | 0                         | 6  | 0.20                              | 2006-10-02 (SM, grav blend)                |
| CB10910 (B)    | 2018-2022                    | 2019.8396  | 577.28                 | 3.51        | 0                         | 11 | 0.40                              | 2016-02-18                                 |
| CC71579 (F)    | 2008-2012                    | 2011.3385  | 605.6                  | 7.74        | 0                         | 26 | 0.36                              | 2008-09-19 (NWR) (R)                       |
| CA08145 (C)    | 2016–2017                    | 2016.7627  | 646.5                  | 27.2        | 0                         | 20 | 0.48                              | 2015-08-14 (NWR)                           |
| ALM-065166 (A) | 2008-2022                    | 2014.6308  | 659.0                  | 0.26        | 0                         | 8  | 0.69                              | 2006-01-01                                 |
| CC309852 (A)   | 2009-2019                    | 2015.1105  | 227.5                  | 2.23        | -0.39                     | 9  | 0.93                              | 2009-10-01 (SM, grav blend)                |
| CC309852 (A)*  | 2011-2019                    | 2015.7837  | 226.8                  | 1.66        | -0.16                     | 8  | 0.36                              | 2009-10-01 (SM, grav blend)                |
| CC327035 (C)   | 2019-2022                    | 2020.7333  | 370.5                  | 5.76        | -0.48                     | 10 | 0.23                              | 2017-10-13 (NWR)                           |
| CA07339 (B)    | 2018-2022                    | 2019.9513  | 365.0                  | 4.777       | -0.32                     | 11 | 0.37                              | 2010-03-01 (BLD, CO grav blend)            |

|                 |           |           |        |       |       |    |      |                     |
|-----------------|-----------|-----------|--------|-------|-------|----|------|---------------------|
| CA06827 (I)     | 2019-2022 | 2021.1466 | 433.5  | 1.91  | -0.30 | 15 | 0.27 | 2018-11-09<br>(NWR) |
| CA06327 (D)     | 2019-2022 | 2021.3555 | 437.0  | 2.94  | -0.56 | 16 | 0.22 | 2018-11-09<br>(NWR) |
| ND15749 (A)     | 2008-2022 | 2014.5413 | 563.6  | 0.40  | -0.02 | 22 | 0.27 | 2001-01-01          |
| CC310014<br>(B) | 2018-2022 | 2019.6369 | 572.9  | -0.03 | 0.19  | 26 | 0.24 | 2010-04-29<br>(NWR) |
| ND16443 (A)     | 2008-2022 | 2015.0192 | 604.6  | 0.45  | -0.03 | 20 | 0.32 | 2001-01-01          |
| ND17445 (A)     | 2008-2022 | 2014.9725 | 632.9  | 0.99  | -0.07 | 22 | 0.46 | 2001-01-01          |
| ND17435 (A)     | 2008-2022 | 2015.3295 | 686.9  | 0.47  | -0.05 | 19 | 0.76 | 2001-01-01          |
| CA05554 (B)     | 2010-2016 | 2014.7948 | 699.67 | 0.85  | 0.46  | 53 | 0.83 | 2009-10-23<br>(NWR) |

\* Alternative assignment when the tank first calibration result, 5 weeks after its fill date in 2009, is dropped from the fit.

Table S5: MAGICC systems target tanks and the polynomial best fits to their calibration histories between 2009 and 2022.

| Tank ID (fill) | Calibration date range on H9 | t0        | Assignment at t0 (ppb) | C1 (ppb/yr) | C2 (ppb/yr <sup>2</sup> ) | N  | Residual standard deviation (ppb) | Fill date (location if known) |
|----------------|------------------------------|-----------|------------------------|-------------|---------------------------|----|-----------------------------------|-------------------------------|
| CC1824 (H)     | 2009-2011                    | 2010.1738 | 574.5                  | 6.22        | 0                         | 4  | 0.51                              | 2006-07-06 (NWR)              |
| CB08834 (B)    | 2011-2018                    | 2015.6272 | 537.8                  | 4.06        | -0.50                     | 10 | 0.57                              | 2011-10-20 (NWR)              |
| CC303036 (A)   | 2010-2017                    | 2013.1491 | 588.3                  | 21.31       | 0.47                      | 10 | 0.44                              | 2008-12-04 (NWR)              |
| CB11143 (C)    | 2019-2022                    | 2020.6759 | 534.7                  | 1.91        | 0                         | 9  | 0.54                              | 2018-11-01 (NWR)              |
| ALMX067998 (C) | 2016-2022                    | 2019.4574 | 542.1                  | 0.62        | 0                         | 13 | 0.28                              | 2016-02-12 (NWR)              |
| CB10292 (B)    | 2020-2022                    | 2021.4553 | 597.4                  | 0.95        | 0                         | 5  | 0.44                              | 2019-10-17 (NWR)              |
| SX-1009237 (A) | 2022-2023                    | 2021.1697 | 526.5                  | 0           | 0                         | 2  | 0.24                              | 2022-11-16 (BLD)              |

Table S6: Summary statistics for SPO flask pair H<sub>2</sub> differences. Npairs= Number of flask pairs.

| System/<br>Instrument | SPO "P" flasks<br>Absolute differences |               |        | SPO "S" flasks<br>Absolute differences |               |        | SPO "S"- "P"<br>Pair mean differences |               |        |
|-----------------------|----------------------------------------|---------------|--------|----------------------------------------|---------------|--------|---------------------------------------|---------------|--------|
|                       | Mean (ppb)                             | Std dev (ppb) | Npairs | Mean (ppb)                             | Std dev (ppb) | Npairs | Mean (ppb)                            | Std dev (ppb) | Npairs |
| MAGICC-2 / H8         | 1.3                                    | 1.0           | 165    | 1.1                                    | 0.9           | 87     | -0.4                                  | 1.5           | 81     |
| MAGICC-1 / H11        | 0.9                                    | 0.8           | 292    | 0.9                                    | 0.8           | 143    | -0.2                                  | 1.3           | 144    |
| MAGICC-3 / H8         | 1.6                                    | 1.3           | 45     | 1.2                                    | 1.2           | 25     | -0.1                                  | 1.7           | 25     |
| MAGICC-3 / H11        | 0.7                                    | 0.6           | 76     | 0.8                                    | 0.6           | 35     | -0.5                                  | 0.8           | 43     |

Table S7: List of sampling sites in the NOAA Cooperative Global Air Sampling Network with revised H<sub>2</sub> measurement records

| Site Code | Name                                                | Country              | Lat (°) | Lon (°)  | Elevation (meters) | Time from GMT |
|-----------|-----------------------------------------------------|----------------------|---------|----------|--------------------|---------------|
| ALT       | Alert, Nunavut                                      | Canada               | 82.451  | -62.507  | 185.0              | -5 hours      |
| AMY       | Anmyeon-do                                          | Republic of Korea    | 36.539  | 126.329  | 47.0               | +9 hours      |
| ASC       | Ascension Island                                    | United Kingdom       | -7.967  | -14.400  | 85.0               | -1 hour       |
| ASK       | Assekrem                                            | Algeria              | 23.262  | 5.632    | 2710.0             | +1 hour       |
| AZR       | Terceira Island, Azores                             | Portugal             | 38.766  | -27.375  | 19.0               | -1 hour       |
| BKT       | Bukit Kototabang                                    | Indonesia            | -0.202  | 100.318  | 845.0              | +7 hours      |
| BMW       | Tudor Hill, Bermuda                                 | United Kingdom       | 32.265  | -64.879  | 30.0               | -4 hours      |
| BRW       | Barrow Atmospheric Baseline Observatory             | United States        | 71.323  | -156.611 | 11.0               | -9 hours      |
| CBA       | Cold Bay, Alaska                                    | United States        | 55.210  | -162.720 | 21.3               | -9 hours      |
| CGO       | Cape Grim, Tasmania                                 | Australia            | -40.683 | 144.690  | 94.0               | +10 hours     |
| CHR       | Christmas Island                                    | Republic of Kiribati | 1.700   | -157.152 | 0.0                | -10 hours     |
| CIB       | Centro de Investigacion de la Baja Atmosfera (CIBA) | Spain                | 41.810  | -4.930   | 845.0              | +1 hour       |
| CPT       | Cape Point                                          | South Africa         | -34.352 | 18.489   | 230.0              | +2 hours      |
| CRZ       | Crozet Island                                       | France               | -46.434 | 51.848   | 197.0              | +5 hours      |

|     |                                                       |                   |         |          |        |           |
|-----|-------------------------------------------------------|-------------------|---------|----------|--------|-----------|
| DSI | Dongsha Island                                        | Taiwan            | 20.699  | 116.730  | 3.0    | +8 hours  |
| EIC | Easter Island                                         | Chile             | -27.160 | -109.428 | 47.0   | -7 hours  |
| GMI | Mariana Islands                                       | Guam              | 13.386  | 144.656  | 0.0    | +10 hours |
| HBA | Halley Station,<br>Antarctica                         | United<br>Kingdom | -75.605 | -26.210  | 30.0   | -2 hours  |
| HPB | Hohenpeissenberg                                      | Germany           | 47.801  | 11.024   | 985.0  | +1 hour   |
| HUN | Hegyhatsal                                            | Hungary           | 46.956  | 16.652   | 248.0  | +1 hour   |
| ICE | Storhofdi,<br>Vestmannaeyjar                          | Iceland           | 63.400  | -20.288  | 118.0  | +0 hour   |
| IZO | Izana, Tenerife,<br>Canary Islands                    | Spain             | 28.309  | -16.499  | 2372.9 | +0 hour   |
| KEY | Key Biscayne, Florida                                 | United States     | 25.665  | -80.158  | 1.0    | -5 hours  |
| KUM | Cape Kumukahi,<br>Hawaii                              | United States     | 19.561  | -154.888 | 8.0    | -10 hours |
| LLN | Lulin                                                 | Taiwan            | 23.470  | 120.870  | 2862.0 | +8 hours  |
| LMP | Lampedusa                                             | Italy             | 35.518  | 12.632   | 45.0   | +1 hours  |
| MEX | High Altitude Global<br>Climate Observation<br>Center | Mexico            | 18.984  | -97.311  | 4464.0 | -6 hours  |
| MHD | Mace Head, County<br>Galway                           | Ireland           | 53.326  | -9.899   | 5.0    | +0 hour   |
| MID | Sand Island, Midway                                   | United States     | 28.219  | -177.368 | 4.6    | -11 hours |
| MLO | Mauna Loa, Hawaii                                     | United States     | 19.536  | -155.576 | 3397.0 | -10 hours |
| NMB | Gobabeb                                               | Namibia           | -23.580 | 15.030   | 456.0  | +1 hour   |



|            |                                      |                      |         |          |        |           |
|------------|--------------------------------------|----------------------|---------|----------|--------|-----------|
| <b>NWR</b> | Niwot Ridge,<br>Colorado             | United States        | 40.053  | -105.586 | 3523.0 | -7 hours  |
| <b>OXK</b> | Ochsenkopf                           | Germany              | 50.030  | 11.808   | 1022.0 | +1 hour   |
| <b>PAL</b> | Pallas-Sammaltunturi,<br>GAW Station | Finland              | 67.973  | 24.116   | 565.0  | +2 hours  |
| <b>PSA</b> | Palmer Station,<br>Antarctica        | United States        | -64.774 | -64.053  | 10.0   | -3 hours  |
| <b>RPB</b> | Ragged Point                         | Barbados             | 13.165  | -59.432  | 15.0   | -4 hours  |
| <b>SEY</b> | Mahe Island                          | Seychelles           | -4.682  | 55.532   | 2.0    | +4 hours  |
| <b>SGP</b> | Southern Great<br>Plains, Oklahoma   | United States        | 36.607  | -97.489  | 314.0  | -6 hours  |
| <b>SHM</b> | Shemya Island,<br>Alaska             | United States        | 52.711  | 174.126  | 23.0   | -10 hours |
| <b>SMO</b> | Tutuila                              | American<br>Samoa    | -14.247 | -170.564 | 42.0   | -11 hours |
| <b>SPO</b> | South Pole,<br>Antarctica            | United States        | -89.980 | -24.800  | 2810.0 | +12 hours |
| <b>SUM</b> | Summit                               | Greenland            | 72.596  | -38.422  | 3209.5 | -2 hours  |
| <b>SYO</b> | Syowa Station,<br>Antarctica         | Japan                | -69.013 | 39.590   | 14.0   | +3 hours  |
| <b>TAP</b> | Tae-ahn Peninsula                    | Republic of<br>Korea | 36.738  | 126.133  | 16.0   | +9 hours  |
| <b>TPI</b> | Taiping Island                       | Taiwan               | 10.379  | 114.371  | 4.0    | +8 hours  |
| <b>USH</b> | Ushuaia                              | Argentina            | -54.848 | -68.311  | 12.0   | -3 hours  |
| <b>UTA</b> | Wendover, Utah                       | United States        | 39.902  | -113.718 | 1327.0 | -7 hours  |
| <b>UUM</b> | Ulaan Uul                            | Mongolia             | 44.452  | 111.096  | 1007.0 | +8 hours  |

|                     |                                                              |                           |        |         |        |          |
|---------------------|--------------------------------------------------------------|---------------------------|--------|---------|--------|----------|
| <a href="#">WIS</a> | Weizmann Institute of Science at the Arava Institute, Ketura | Israel                    | 29.965 | 35.060  | 151.0  | +2 hours |
| <a href="#">WLG</a> | Mt. Waliguan                                                 | Peoples Republic of China | 36.288 | 100.896 | 3810.0 | +8 hours |
| <a href="#">ZEP</a> | Ny-Alesund, Svalbard                                         | Norway and Sweden         | 78.907 | 11.888  | 474.0  | +1 hour  |

## Figures

Figure S1. 2018-2022 H<sub>2</sub> calibration histories of eight MAGICC-3 standards

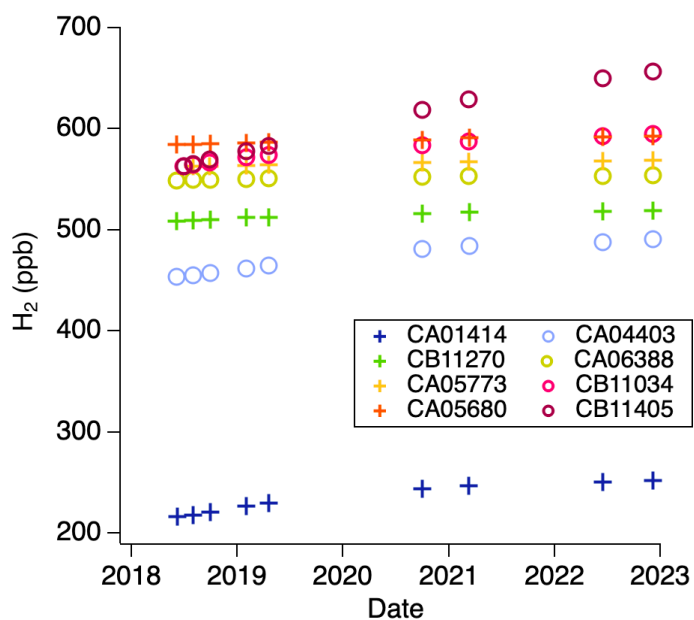

Figure S2: H<sub>2</sub> residuals from the 2018-2022 calibration history trend function for eight MAGICC-3 working standards (see Table S3)

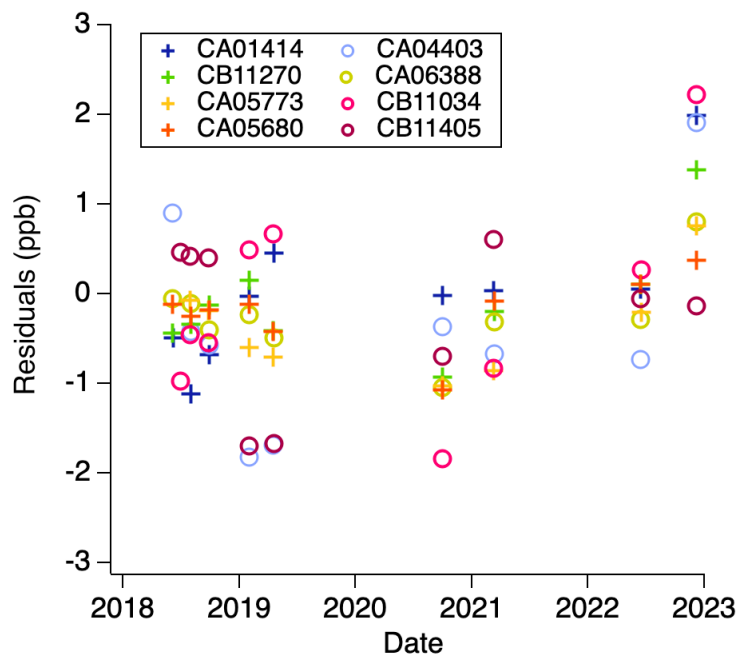

Figure S3. MAGICC-3 reference air deviation over time from mean  $H_2$  derived from response curves with  $x=1$  (in ppb).

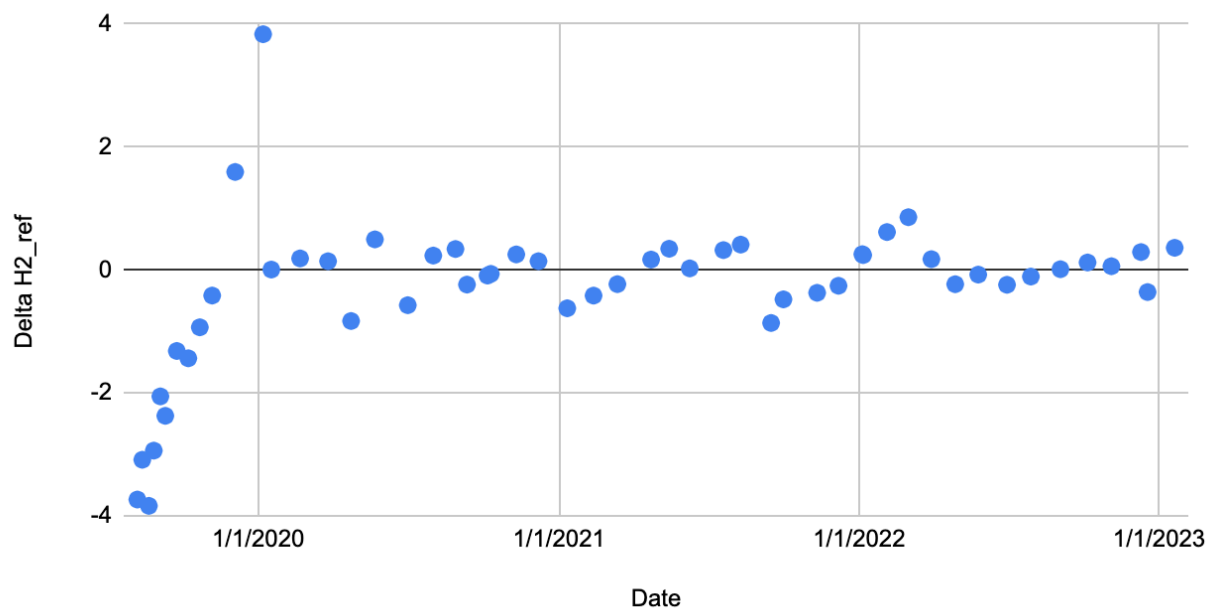

Figure S4. H9 Target tanks with quadratic polynomial fits to their calibration histories shown in plot a). Residuals from each tank best fit are shown in b) as a function of the initial assignment and c) as a function of the tank analysis date. d) Residuals standard deviation versus initial assignments (coef0) for all H9 Target tanks. For the lowest H<sub>2</sub> target tank (CC309852), we show the residuals to the first assignment (in plot c) and the standard deviation for residuals for the 2 assignments in Table S4 (in plot d). All values are in ppb.

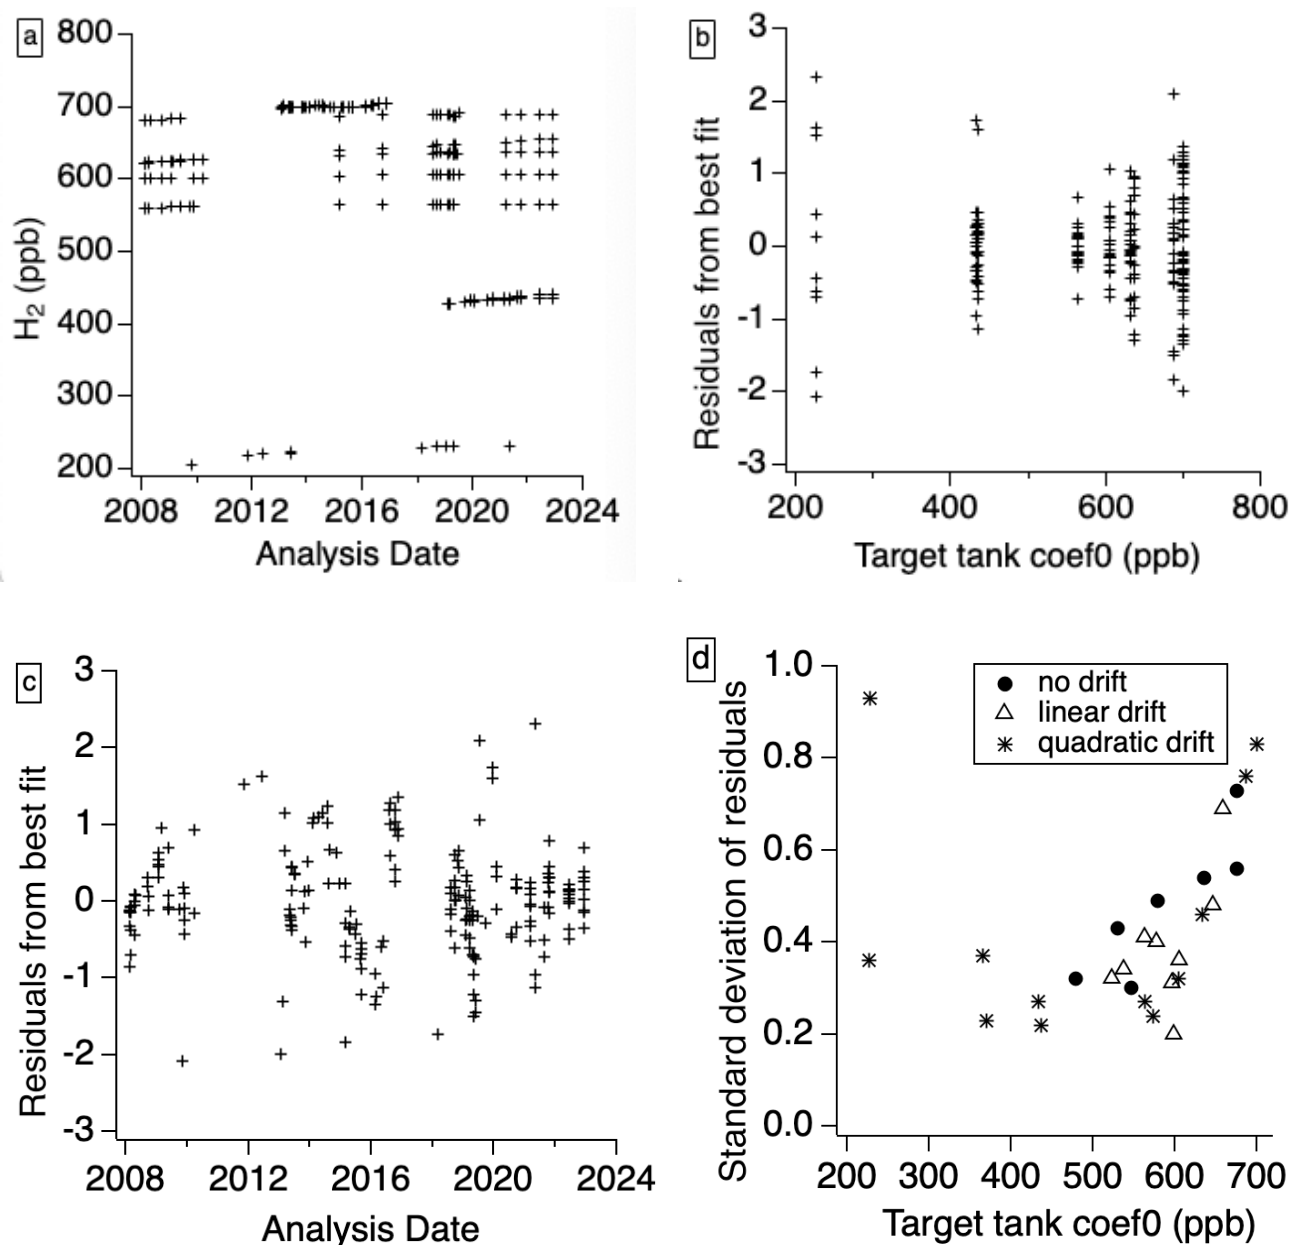

Figure S5: NOAA and MPI-BGC  $H_2$  results for the MPI-BGC GasLab led MENI tank air measurement round robin comparisons (Jordan and Damak, 2022). NOAA measurement results on H9 are shown in blue. Blue open symbols and asterisks show rejected NOAA results due to poor instrument performance or the use of an alternate calibration strategy respectively. All H9 tank air results for the period September 12-18, 2019 were biased high by a few ppbs. The reason is unknown at this point. Most MPI-BGC results (red symbols) are on their GC-PDD instrument, except the April 2020 results are from their GC-RGA instrument (open red symbols). a) Cylinder D232733 is a blind sample and is refilled with different air after each round robin analysis loop. b) Ambient  $H_2$  cylinder D232733 ( $\sim 565$  ppb) and c) low  $H_2$  cylinder D232717 ( $\sim 335$  ppb) have slightly increasing  $H_2$ . The NOAA and MPI-BGC  $H_2$  results agree well for the ambient and blind  $H_2$  MENI tanks ( $< 1$  ppb difference). The error bars indicate the reported reproducibility or the standard deviation when it is larger than the reported reproducibility.

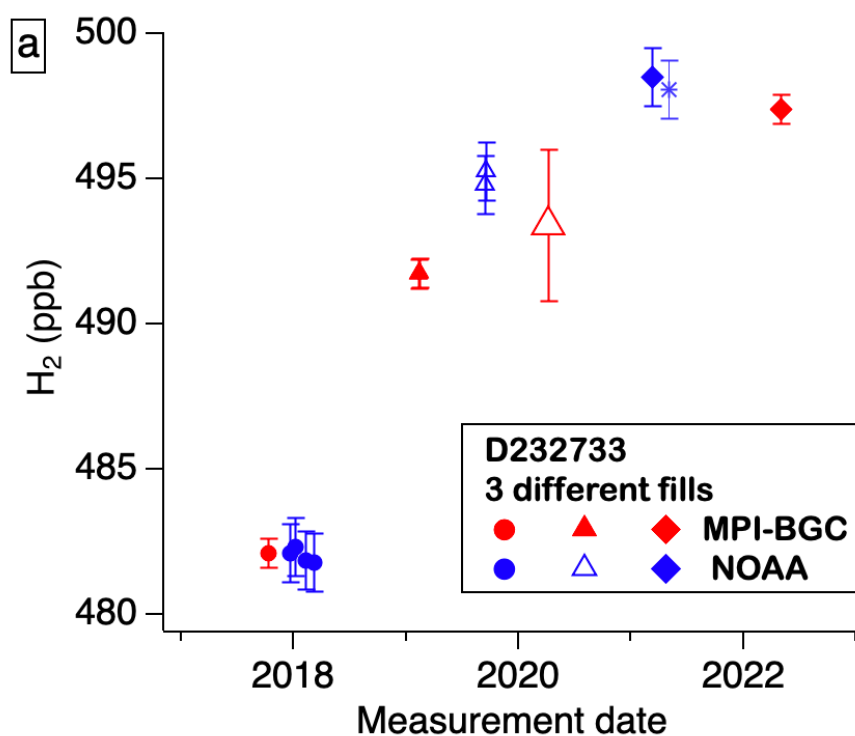

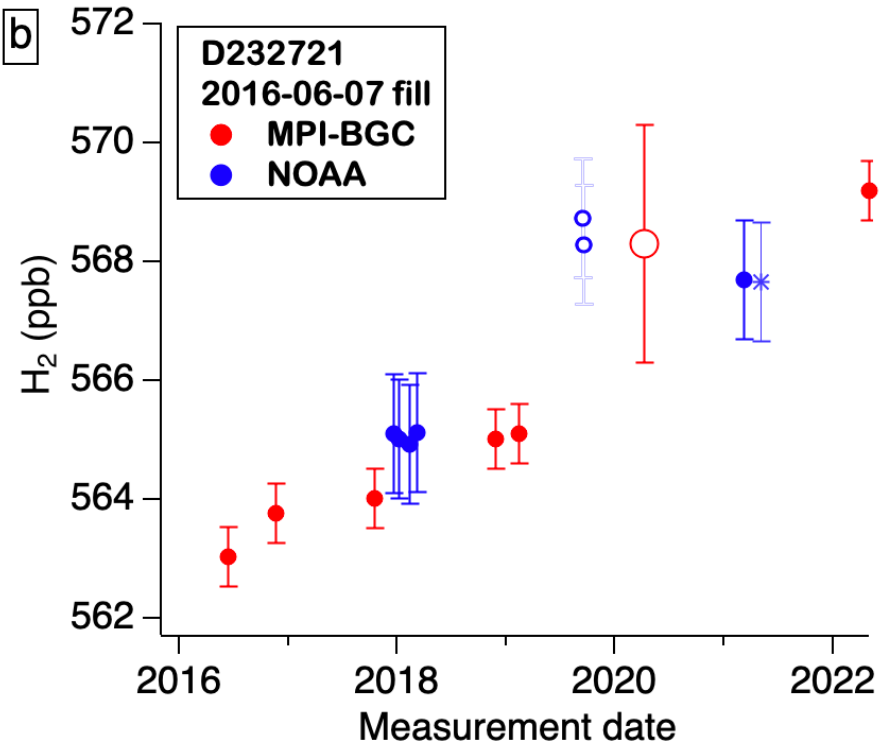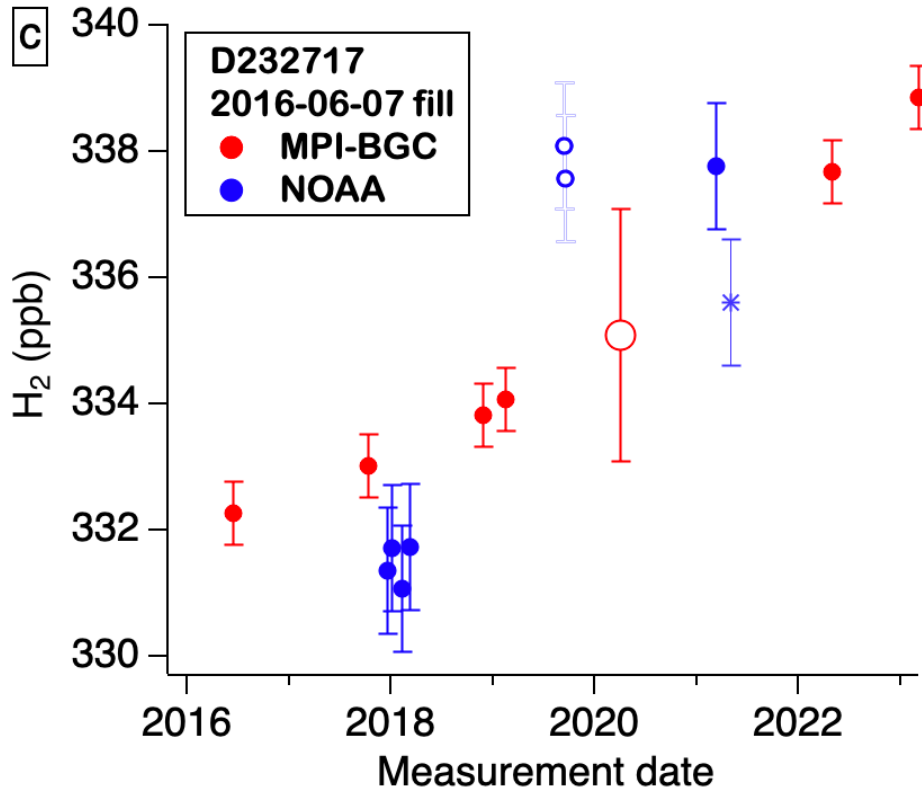

Figure S6. H<sub>2</sub> calibration histories of test air tanks 2008-2022. Each test air cylinder has a different color and different tank fills are shown with different symbols.

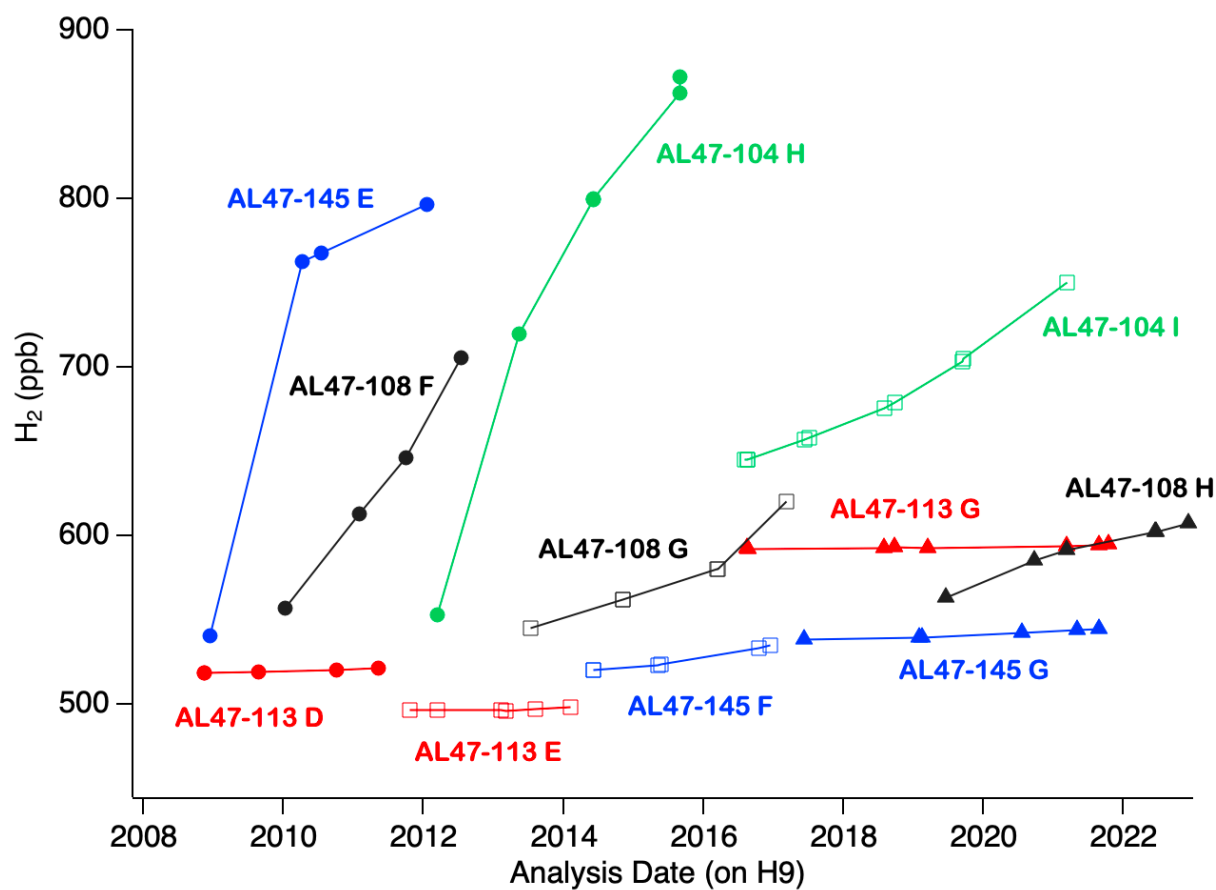



Figure S7. Test air (TST) flask analysis results : differences from test air tank time-dependent  $H_2$  assignment: a) on H8, b) on H11 and c) on MAGICC-3.

a)

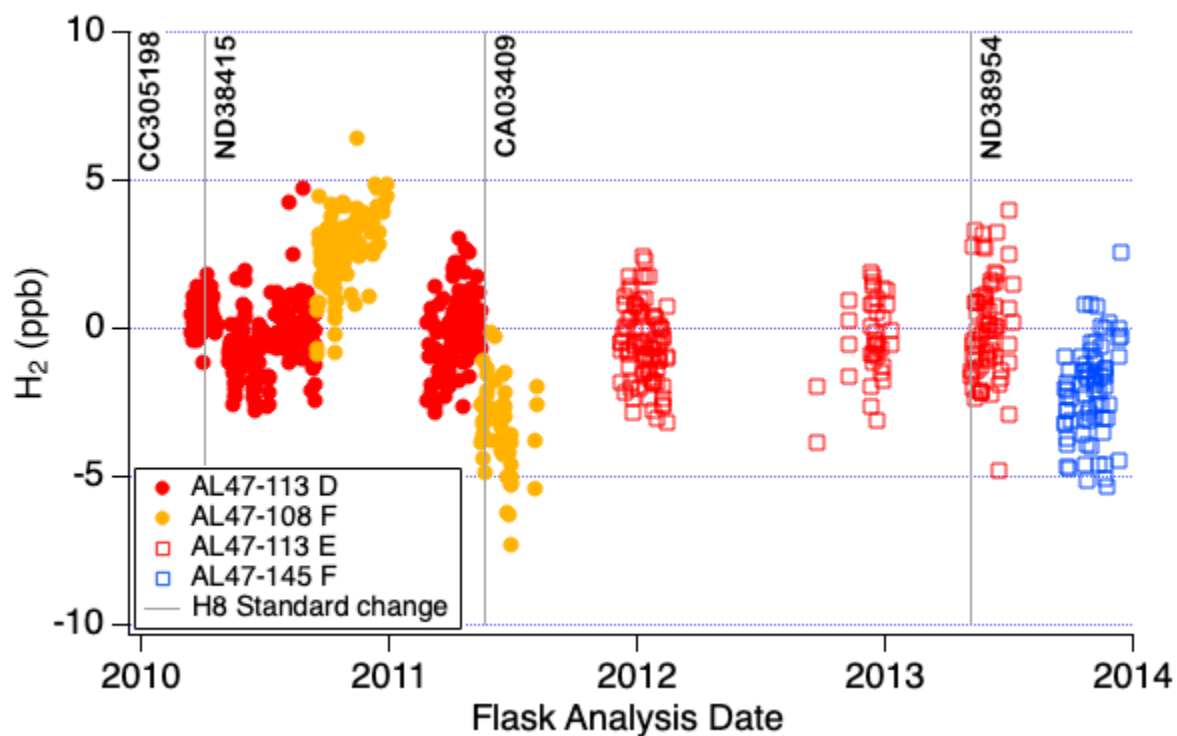

b)

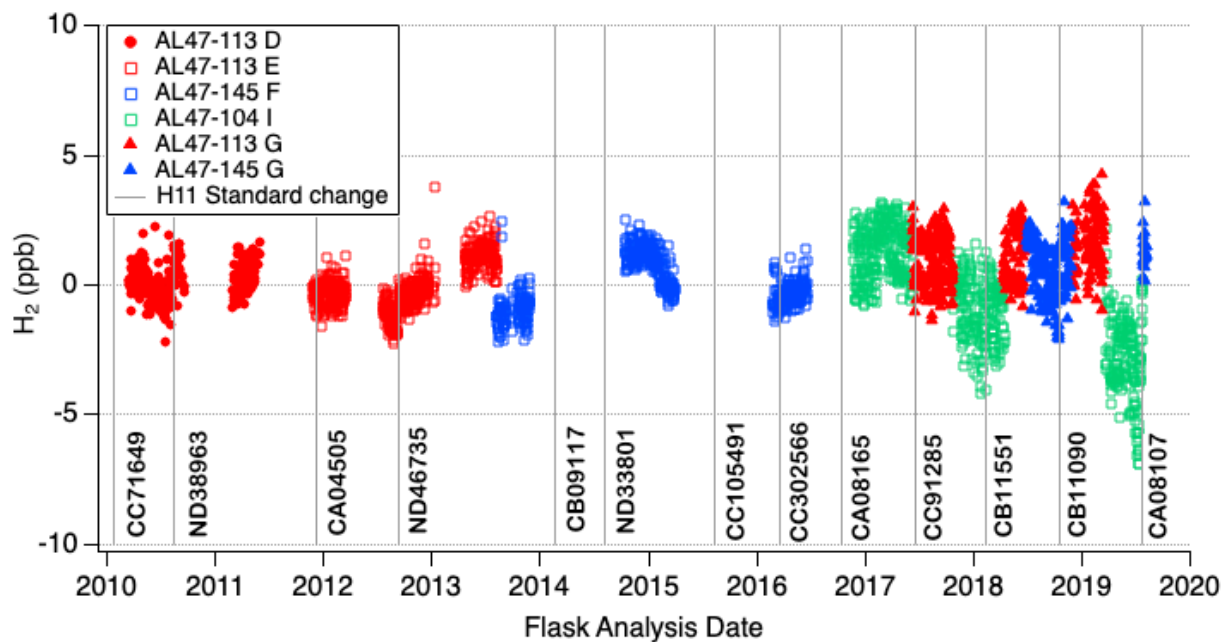

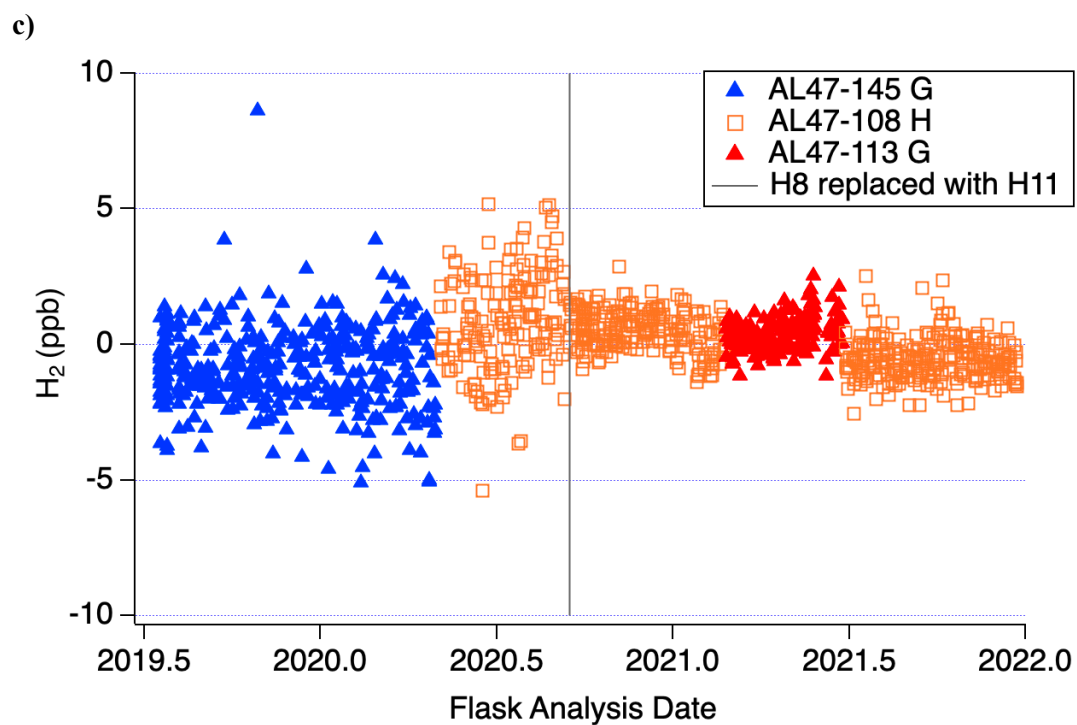

Figure S8: NOAA Cooperative Global Air Sampling Network site map (<https://gml.noaa.gov/dv/site/>). The four NOAA atmospheric baseline observatories (BRW, MLO, SMO, SPO) are shown in blue.

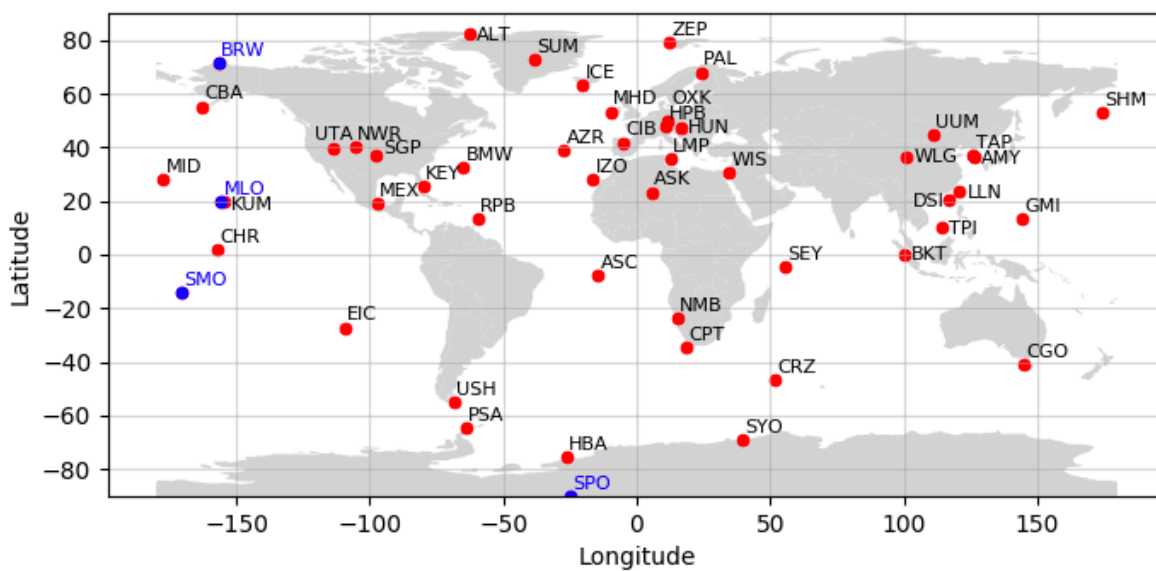

Figure S9: Discrete air H<sub>2</sub> mole fraction (in ppb) time series at 51 sites from the NOAA Cooperative Global Air Sampling Network. Data in light blue symbols are retained and data shown in gray crosses are deemed to be non-background. Rejected data are not shown but are present in the site data files. A curve fit python code is run for each site H<sub>2</sub> time series based on Thoning et al. (1989). First the code optimizes parameters for a function made of a four-term harmonic and a cubic polynomial. The resulting residuals are then smoothed with a low-pass filter with a 667 day cutoff and are added to the polynomial part of the function to produce the “trend curve” shown as the dark blue line. The residuals are also smoothed with a low-pass filter with a 80 day cutoff and are added to the function to produce a “smooth curve”. The last plot shows all retained H<sub>2</sub> measurements from the Pacific Ocean Shipboard (POC).

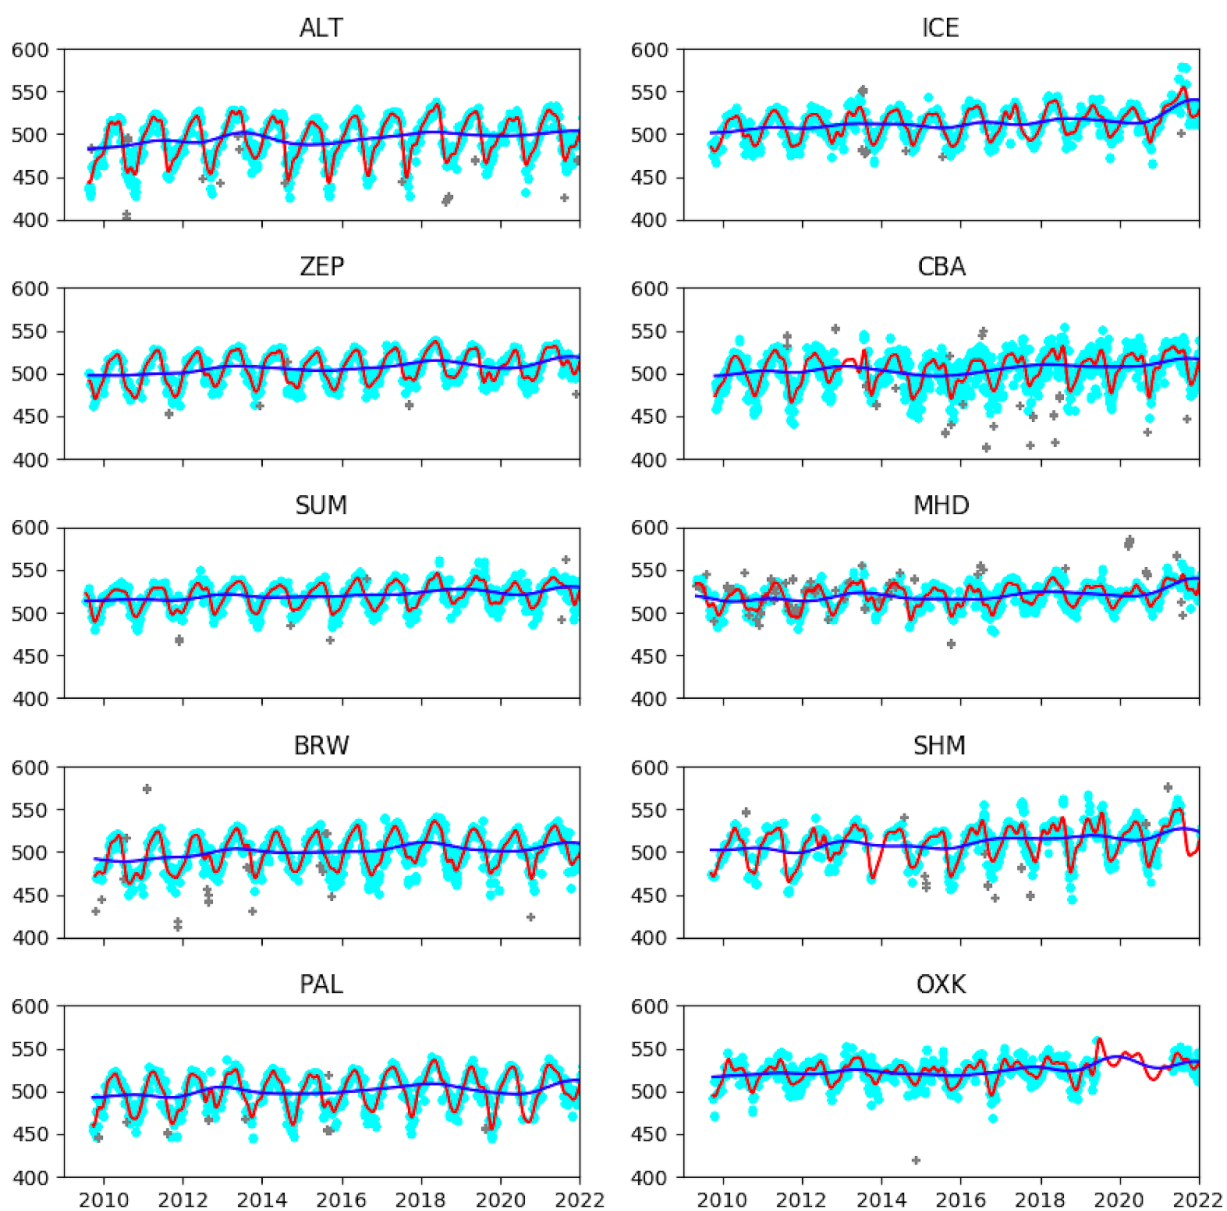

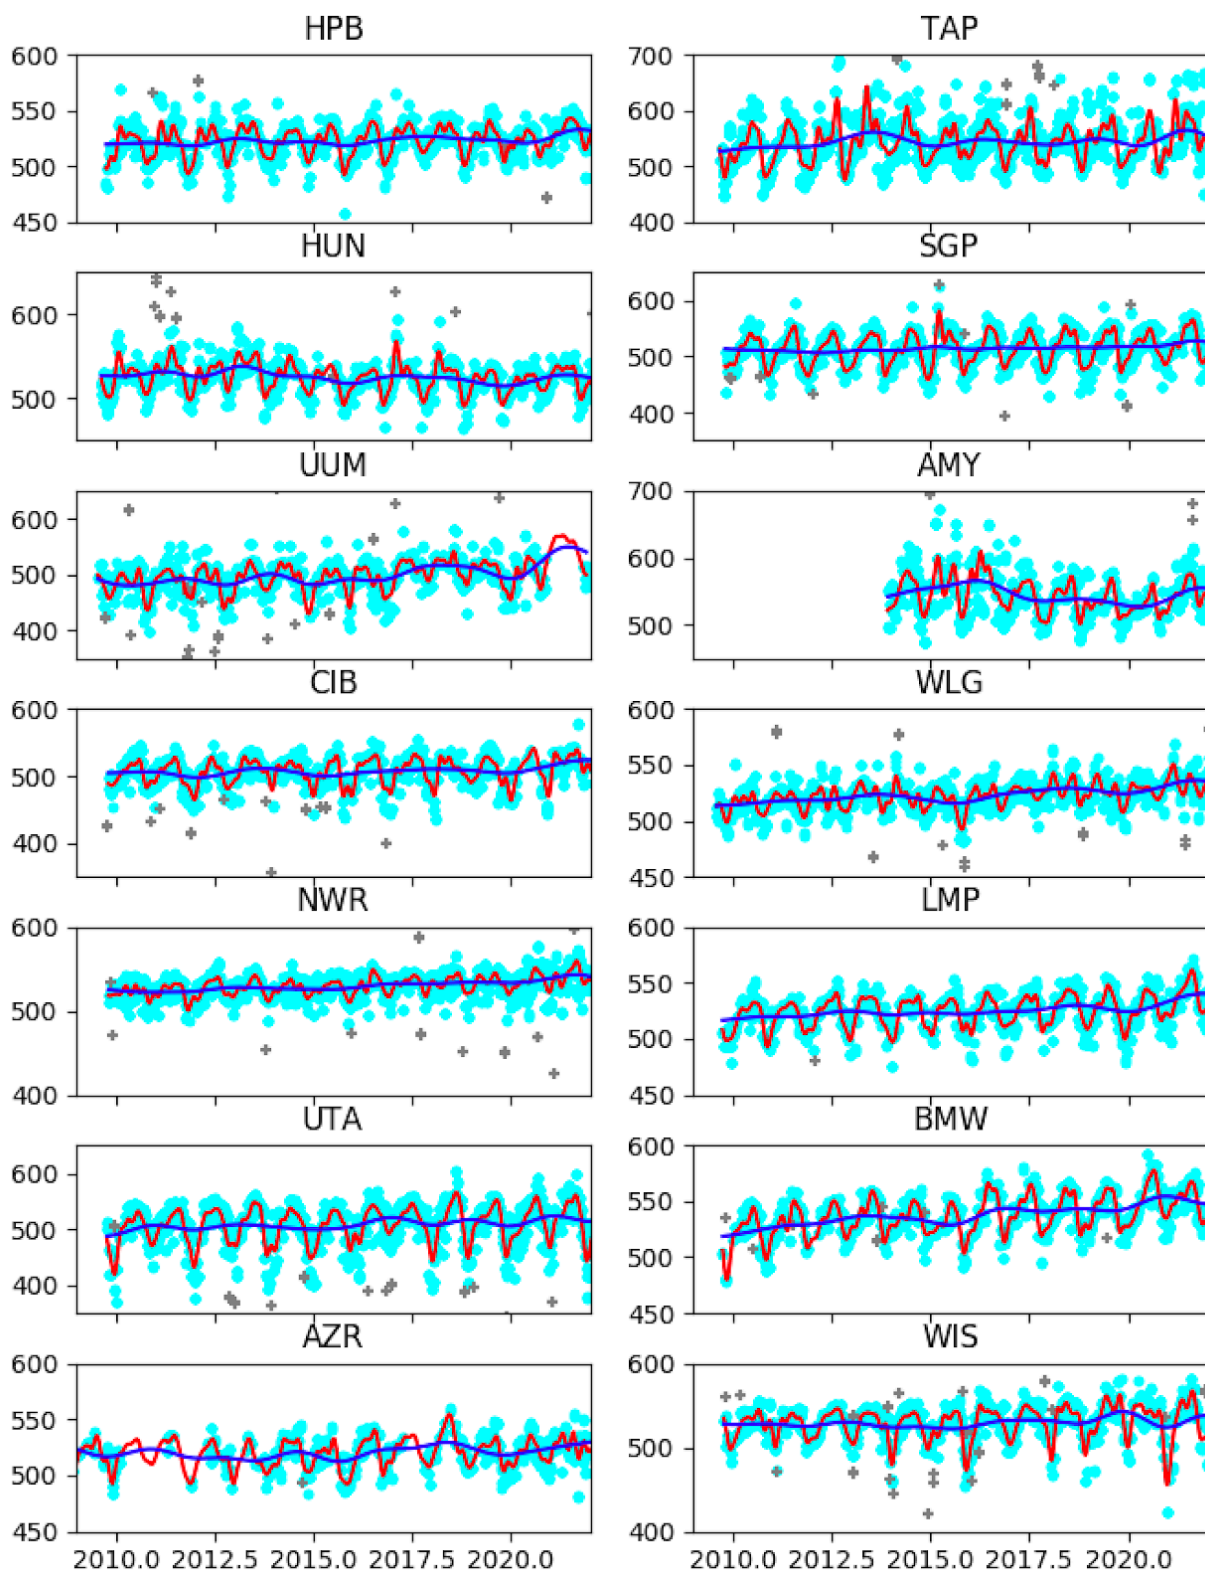

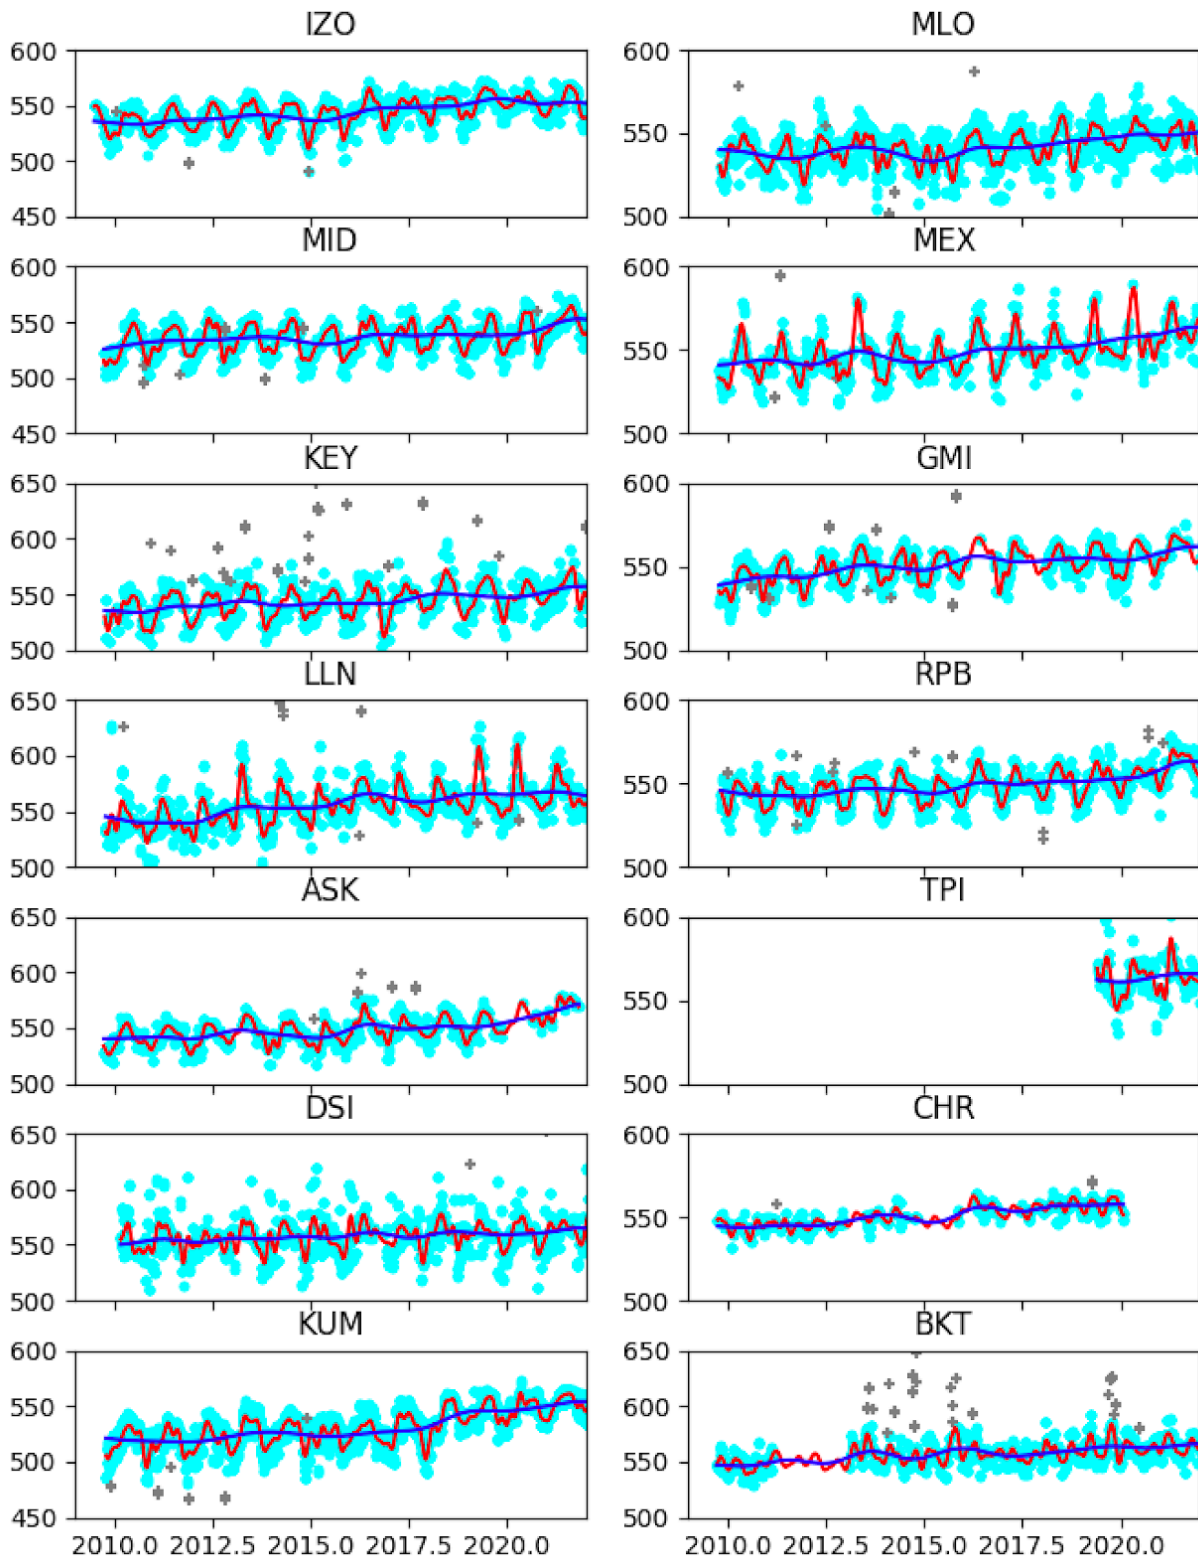

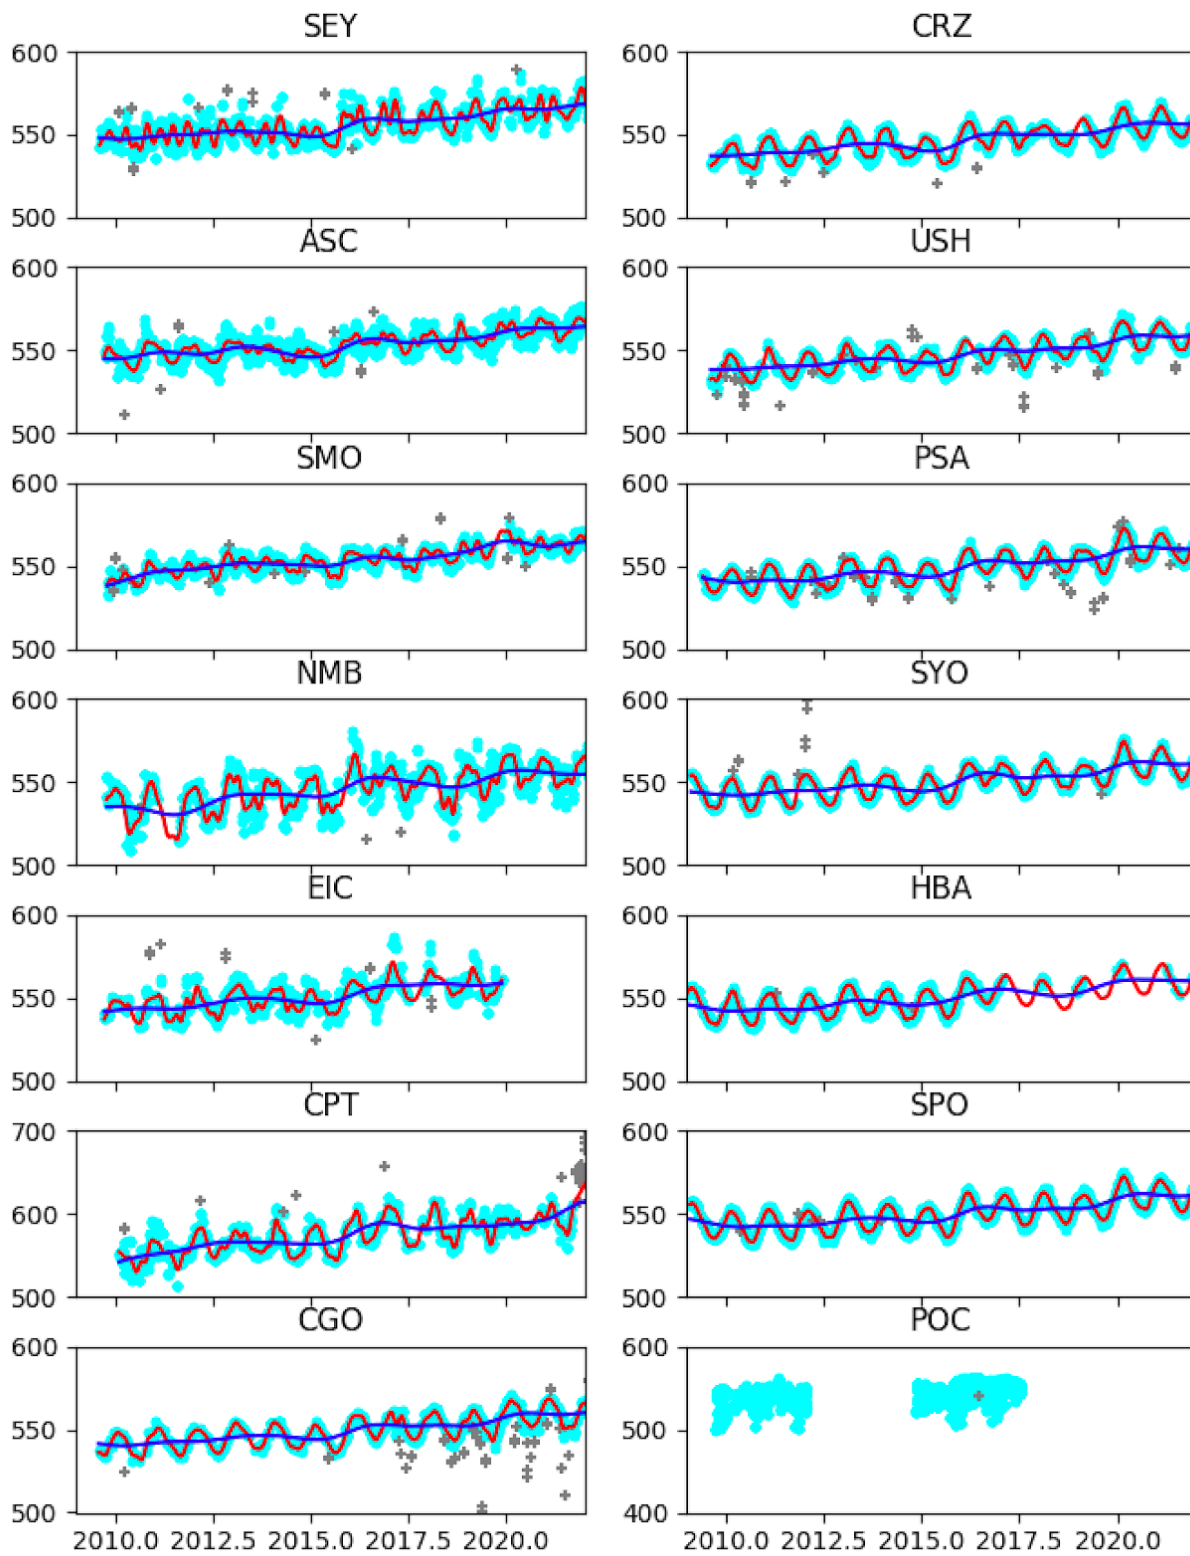

Figure S10: Marine boundary layer global mean and zonal mean  $H_2$  (black, left side y axis) and CO (dashed blue line, right y axis) 2010-2021 time series

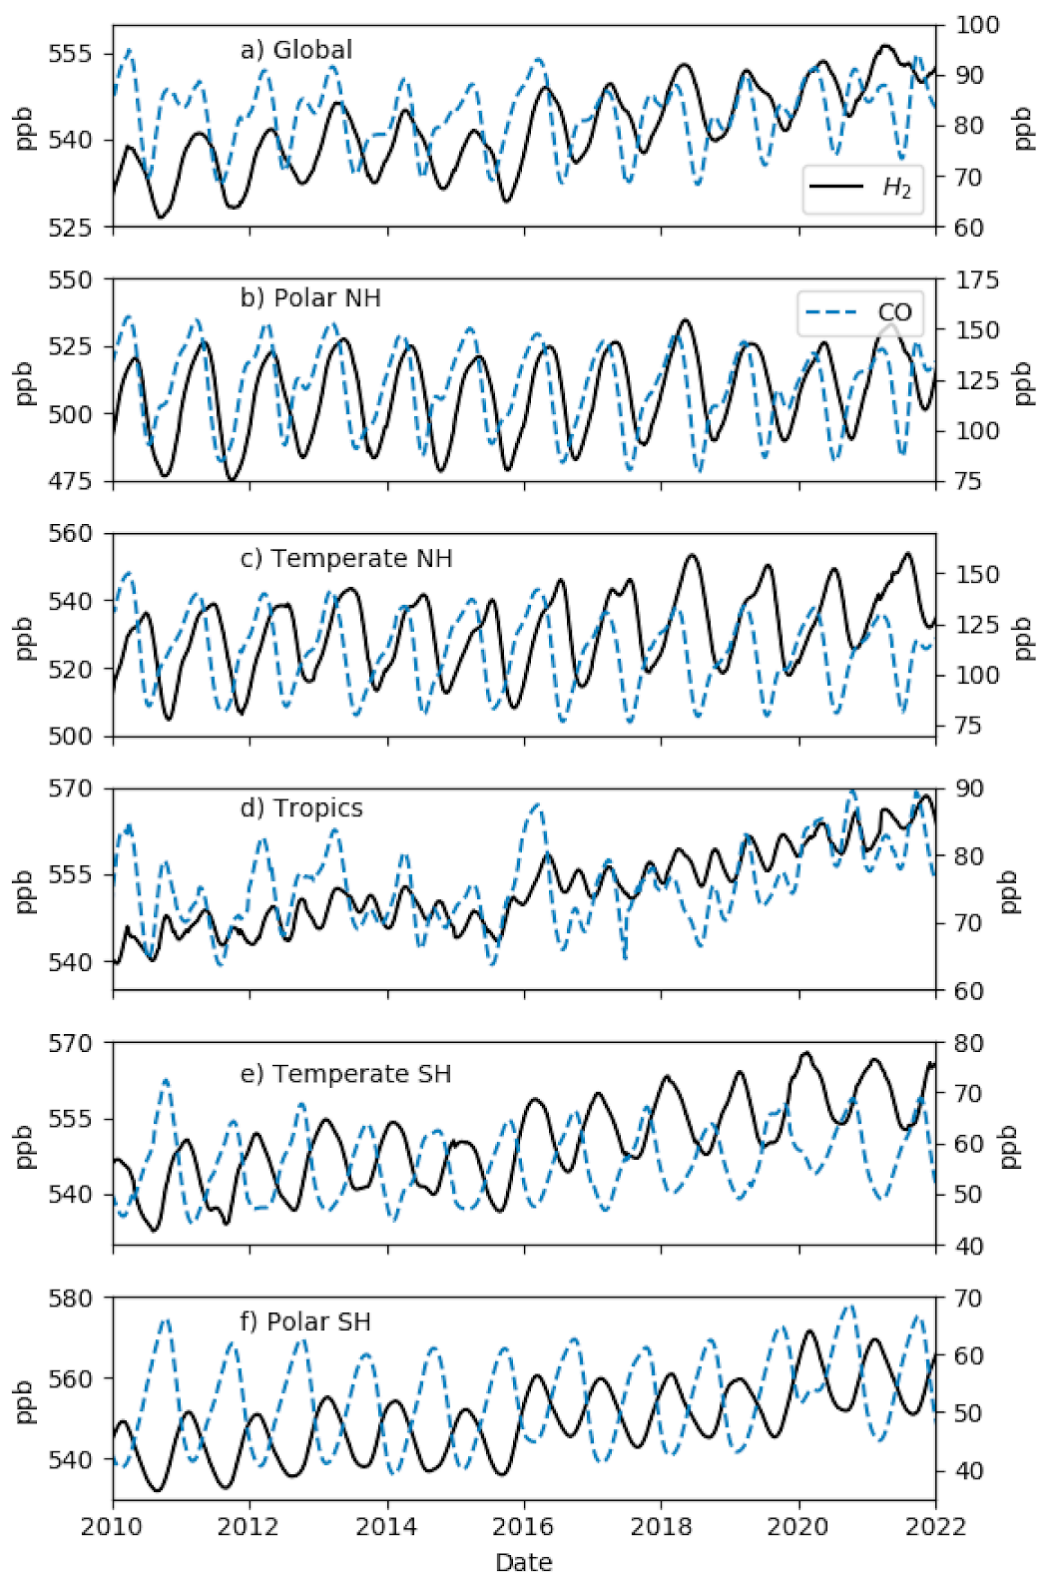

Figure S11: NOAA H<sub>2</sub> (blue, left axis) and CO (orange, right axis) measurement times series for three Cooperative Global Air Sampling Network sites in Iceland (ICE: 63.400°N, 20.288° W, 118 masl), Indonesia (BKT: 0.202° S, 100.318° E, 845 masl) and Tasmania, Australia (CGO: 40.683° S, 144.690° E, 94 masl).

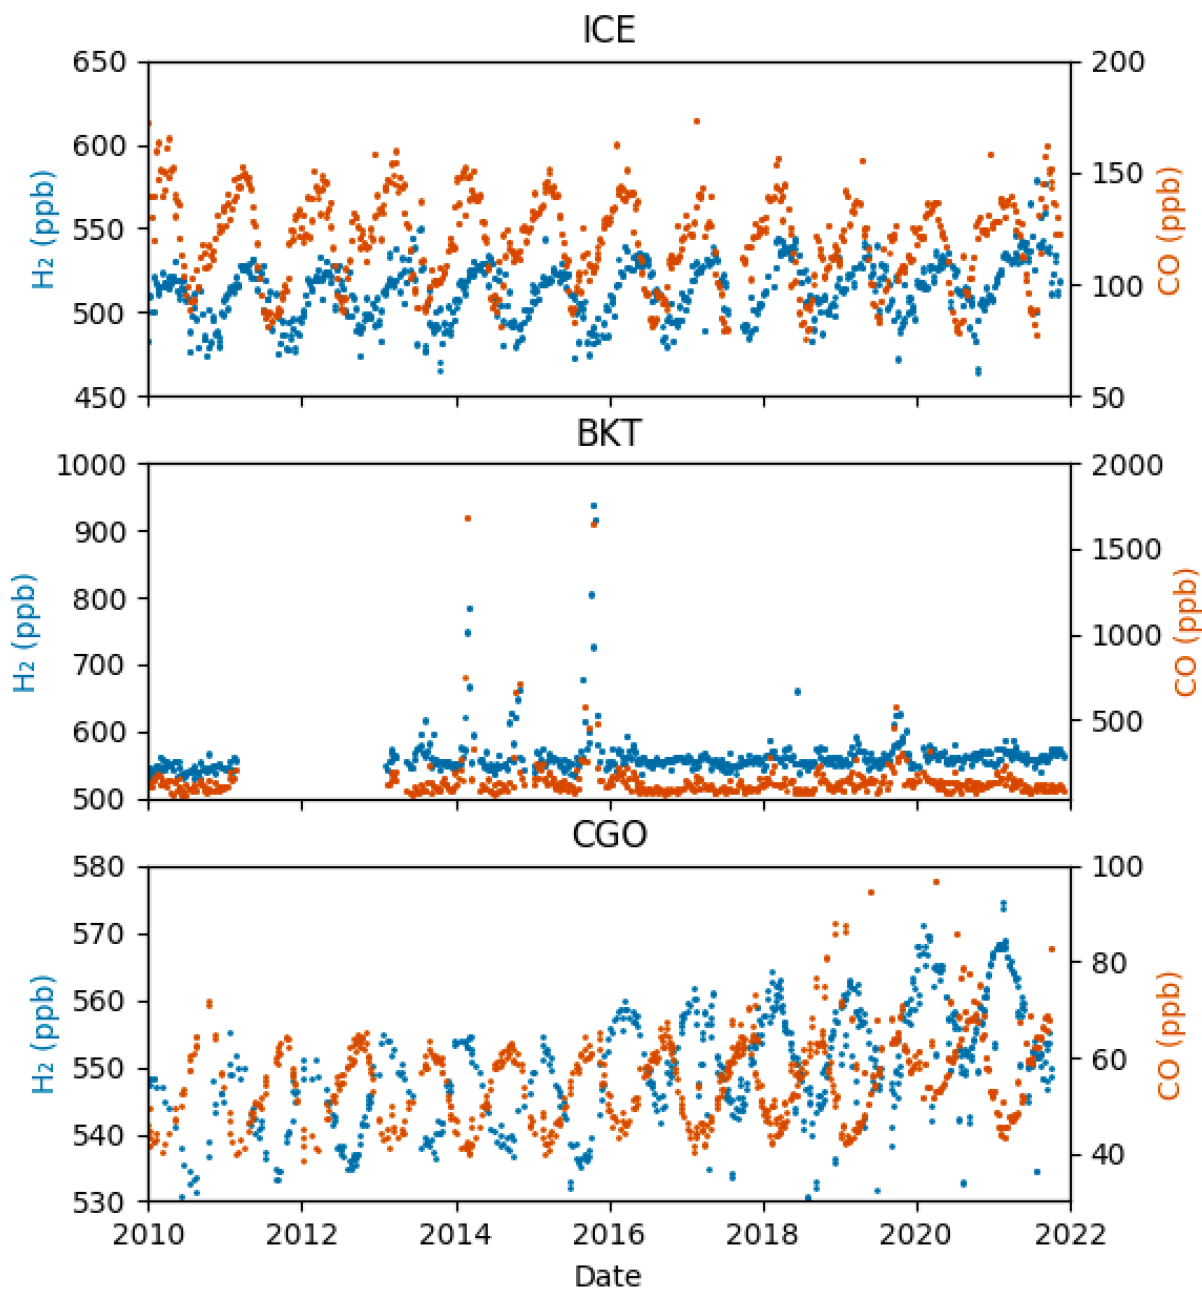



Figure S12: NOAA H<sub>2</sub> secondary standard CC119811 results on Peak Labs instrument (P2) and on GC-HePDD H9 using one point calibration against one of the primary standards.

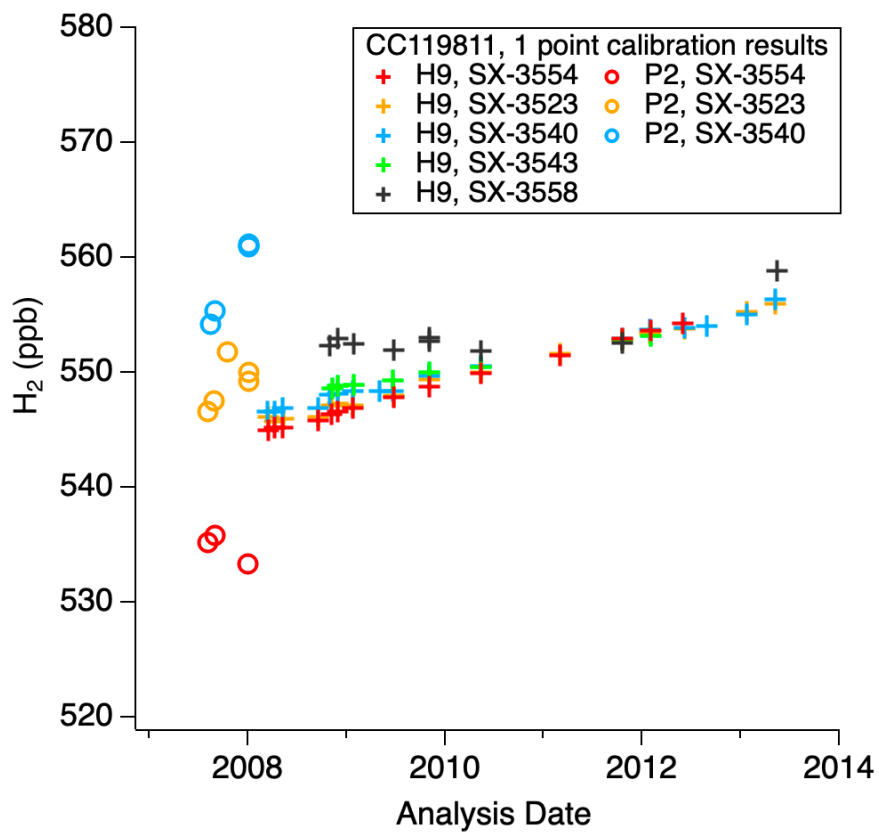

Figure S13: Early target tanks measurement records on different instruments using one point calibration. The working standard/reference tank ID for the measurements on RGA instruments is indicated in the legend.

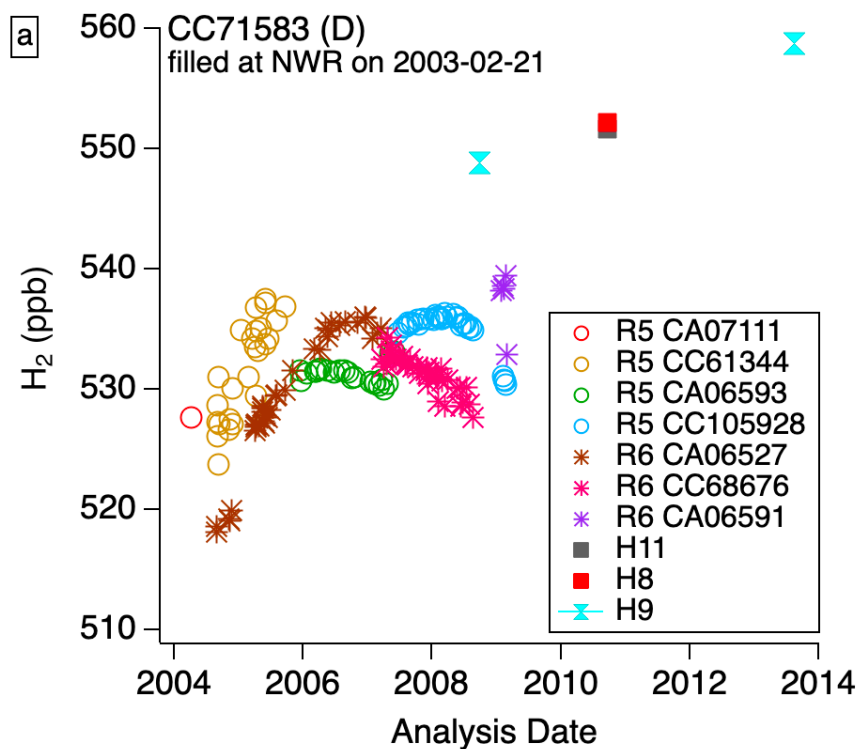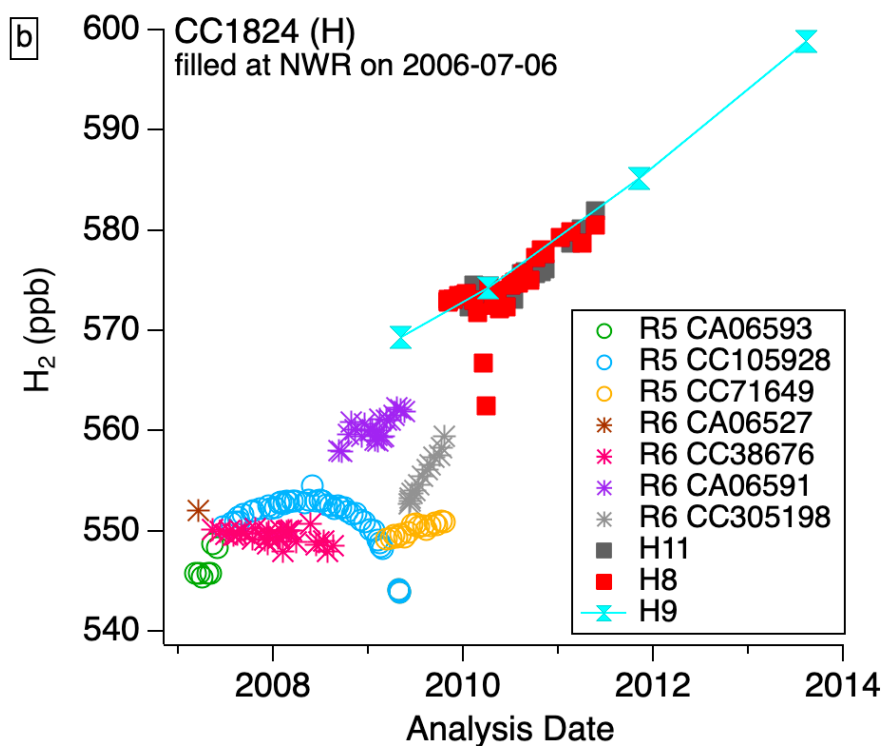

Supplement: Supplementary file 1 [file amt-17-4803-2024-supplement.pdf]
